1 **Title: Peroxisome import stress impairs ribosome biogenesis and induces integrative stress**  
2 **response through eIF2 $\alpha$  phosphorylation**

3 **Authors:**

4 Kerui Huang <sup>1\*†</sup>, Jinoh Kim <sup>1†</sup>, Pham Vo <sup>1</sup>, Ting Miao <sup>1</sup>, Hua Bai <sup>1\*</sup>

5 <sup>†</sup> Co-first authors

6 **Affiliations:**

7 1 Department of Genetics, Development, and Cell Biology, Iowa State University, Ames, IA  
8 50011, USA

9 **\*Corresponding Author:**

10 Kerui Huang

11 Email: keruih@iastate.edu

12 Hua Bai

13 Email: hbai@iastate.edu

14

15

16

17

18

19

20

21

22

23

## 24 **Abstract**

25 Peroxisome biogenesis diseases (PBDs) are characterized by global defects in peroxisomal  
26 function and can result in severe brain, liver, kidney, and bone malfunctions. PBDs are due to  
27 mutations in peroxisome biogenesis factors (PEX genes) that are responsible for peroxisome  
28 assembly and function. Increasing evidence suggests that peroxisome import functions decline  
29 during aging. However, the transcriptome profiling of peroxisome import defects and how they  
30 affect disease development are still lacking. *PEX5* encodes the cytoplasmic receptors for  
31 peroxisome-targeting signal types 1. We generate knock-in human HEK293 cells mutant using  
32 CRISPR to transiently express *PEX5* cysteine 11 to alanine mutant (*PEX5*<sup>C11A</sup>), which blocks  
33 *PEX5* recycling and exerts dominant negative effect on *PEX5* mediated peroxisome import. To  
34 identify conserved responses, we perform transcriptomic analysis on *Drosophila* oenocyte-  
35 specific Pex1, Pex12 and Pex5 knockdowns and on human cells with impaired peroxisome  
36 import (*PEX5*<sup>C11A</sup> and *PEX5* siRNA respectively). *PEX5*<sup>C11A</sup> induction triggers vast  
37 transcriptomic changes, including decreased oxidative phosphorylation, increased MAPK  
38 signaling and HIPPO signaling. *PEX5* siRNA specifically decreases spliceosome activity and  
39 increases cholesterol metabolism. Using gene set enrichment analysis (GSEA), we identify  
40 protein processing in endoplasmic reticulum pathway, specifically ER-associated protein  
41 degradation (ERAD) pathway is induced in all PEX knockdowns in *Drosophila*. Peroxisome  
42 dysfunction elevates eIF2 $\alpha$  phosphorylation in both *Drosophila* and human cell culture  
43 independent of *XBPI* activation, suggesting increased integrative stress response (ISR).  
44 Moreover, peroxisome stress decreases ribosome biogenesis genes and impairs ribosome  
45 biogenesis in flies and human cells. Specifically, peroxisome stress impairs the 5'-ETS cleavage  
46 activity during the ribosome biogenesis and dampens 40S small ribosomal export in both flies

47 and human. Our results suggest that reduced ribosome biogenesis and elevated ISR could be  
48 conserved cellular response to peroxisome import stress.

## 49 **Introduction**

50 Peroxisomes are single-membrane organelles found in almost all eukaryotic cells.  
51 Peroxisomes are highly dynamic and versatile, as their composition and activity varies between  
52 organisms, different cell types and under different environmental stresses<sup>1</sup>. Generally  
53 peroxisomes are responsible for metabolizing branched-chain fatty acids (BCFA) or very long  
54 chain fatty acids (VLCFAs), purine catabolism, synthesis of plasmalogens, ether-lipids and bile  
55 acids, regulation of hydrogen peroxide and other reactive oxygen species (ROS)<sup>1,2</sup>. In  
56 mammals,  $\beta$ -oxidation occurs largely in the mitochondria. Peroxisomes are normally required for  
57 catabolism of BCFA and VLCFAs, however it can perform  $\beta$ -oxidation on other fatty acids when  
58 mitochondria are compromised<sup>3</sup>. Peroxisomes have close interaction with many other  
59 organelles. Peroxisomes can physically interact with other organelles including the endoplasmic  
60 reticulum (ER), mitochondria, lipid droplets, lysosomes and chloroplasts, to perform specific  
61 functions<sup>4</sup>.

62 Peroxisomes are formed by the action of 14 peroxisome assembly factors (Peroxisins). The  
63 majority of which are involved in translocation of peroxisomal enzymes into the peroxisome  
64 matrix. Others are responsible for transporting peroxisome membrane proteins<sup>5-8</sup>. Unlike  
65 mitochondria, the peroxisome is composed of single membrane and it could import fully folded  
66 and oligomeric proteins into the matrix<sup>9</sup>. Peroxisomal matrix proteins contain one of two types  
67 of intrinsic peroxisomal targeting signals (PTSs), PTS1 or PTS2, which can direct import into the  
68 organelle<sup>9</sup>. Most matrix proteins are targeted through the PTS1 pathway. PTS1 consists of a  
69 tripeptide (-SKL or conserved variant) at the C-terminal and it can be recognized by a soluble  
70 receptor, Pex5<sup>9</sup>. Pex7 will recognize PTS2 containing proteins near the N terminus. Pex5 and

71 Pex7 bind their respective PTSs in the cytosol, and the receptor-cargo complexes will dock to the  
72 peroxisome surface, containing Pex13 and Pex14 docking complexes. Cargo is released from  
73 Pex5 and imported into peroxisomes. Then Pex5 is mono-ubiquitylated by Pex4 and Pex12,  
74 enables Pex5 recycling back to the cytosol for another round of import. Pex5 can also undergo  
75 polyubiquitylation (by the ubiquitin-conjugating and ligase enzymes, Ubc4 and Pex2  
76 respectively), which directs Pex5 to the proteasome for degradation (see excellent review in <sup>10</sup>).  
77 Mutations in these peroxin genes and peroxisome resident enzymes can lead to a variety of  
78 disorders, known as peroxisome biogenesis disorders (PBD) with involvement of kidney, brain,  
79 bone and liver, and death in infants <sup>11-14</sup>.

80       Recently there are increasing evidence placing peroxisome, especially peroxisomal  
81 import function, as an important regulator for aging. Several studies suggest that peroxisomal  
82 import function declines with age <sup>15-17</sup>. Consistently, our translatomic study shows that the  
83 majority of peroxisome genes are downregulated in aged fly oenocytes <sup>18</sup>. Our previous study  
84 identified that peroxisome import activities in fly oenocytes can non-autonomously regulate  
85 cardiac arrhythmia during aging <sup>19</sup>. Several other studies have also implicated that peroxisome is  
86 involved in longevity <sup>20-22</sup>. However, it remains elusive how impaired peroxisome import activity  
87 contributes to cellular processes such as aging.

88       Ribosome biogenesis is one of the regulators of aging. The reduced level of ribosomal  
89 genes, ribosome biogenesis factors or nutrient sensing pathways (such as TOR signaling), which  
90 stimulate ribosome production, can increase the lifespan in multiple organisms, including *C.*  
91 *elegans*, *D. melanogaster*, yeast, mice and human <sup>23</sup>. Because the rate of protein translation is  
92 proportional to the rate of ribosome biogenesis <sup>24, 25</sup>, it was suggested that reduced ribosome  
93 biogenesis can reduce protein synthesis thus maintaining global proteostasis <sup>23</sup>. The biogenesis of

94 the 60S and 40S ribosomal subunits follows a complicated pathway in eukaryotic cells, which  
95 requires the assembly of four rRNAs and ~80 ribosomal proteins (RPs)<sup>26</sup>. Ribosome biogenesis  
96 occurs in the nucleolus and is initiated by transcription of a large precursor rRNA (pre-rRNA)  
97 through RNA polymerase I (Pol I), from which the mature 18S, 5.8S, and 25S rRNAs are  
98 generated<sup>27</sup>. The 5S pre-rRNA is transcribed by RNA polymerase III and incorporated into  
99 nascent pre-ribosome in later step<sup>28</sup>. The pre-rRNA will assemble co-transcriptionally with  
100 numerous trans-acting factors and early binding ribosomal proteins for the small subunit,  
101 forming a macromolecular complex, named 90S pre-ribosome or small-subunit (SSU)  
102 processome<sup>29,30</sup>. In the first 90S assembly intermediate, the pre-rRNA undergoes site-specific  
103 base modifications at conserved sites and cleavage reactions. These early cleavages will produce  
104 20S pre-rRNA (precursor to 18S), which becomes part of the early pre-40S particle. The pre-40S  
105 particle will follow a simple maturation route to the cytoplasm where mature 40S is produced.  
106 Ribosome biogenesis is tightly controlled by nutrient availability and extracellular conditions.  
107 Myc and TOR pathways are known regulators of ribosome biogenesis<sup>31,32</sup>, however it remains  
108 elusive whether there are additional regulators of this complex biological process.

109 Using human HEK293 and HepG2 cell lines, in combination of *Drosophila* tissue  
110 specific RNAi, we sought to characterize conserved cellular responses under peroxisome import  
111 stress. Our study discovered distinct transcriptional responses from knocking down different  
112 components involved in peroxisome import pathways, suggesting PEXs proteins perform  
113 additional activities besides facilitating Pex5. Genes participate in protein process and in  
114 endoplasmic-reticulum-associated protein degradation (ERAD) are highly induced across all  
115 PEXs knockdowns in flies, suggesting an induced ER stress under peroxisome defects. We also  
116 identified repression of oxidative phosphorylation genes and induced inflammation pathways

117 across fly and humans, suggesting close interplay of peroxisome and mitochondria. Finally, for  
118 the first time our study discovered a conserved reduction of ribosome biogenesis genes and  
119 reduced ribosome biogenesis activity, under peroxisome import stress across fly and human.  
120 Together, these findings shed lights on mechanisms of PBD pathology and aging.

## 121 **Results**

### 122 **Transcriptomic analysis for peroxisomal stress response in *Drosophila* oenocytes and** 123 **human cells**

124 Despite the emerging importance of peroxisome in the regulation of aging and  
125 metabolism, little is known how cells mount defensive response to maintain cellular homeostasis.  
126 Oenocytes are hepatocyte-like cells that are highly enriched with peroxisomes<sup>19, 33</sup>. In addition,  
127 the oenocyte peroxisome was identified as an important regulator for age-related production of  
128 inflammatory factor, unpaired 3 (upd3)<sup>19</sup>, which could dampen cardiac function non-  
129 autonomously. To study cellular responses induced by peroxisomal stress, we performed  
130 transcriptomic analysis from *Drosophila* oenocytes and human cell cultures. We target on  
131 peroxisome import stress by knocking down key factors (peroxins) involved in peroxisomal  
132 import process (Pex5, Pex12 and Pex1) specifically in oenocytes, which were shown to  
133 efficiently induce the ROS level and upd3 production<sup>19</sup>. Pex5 is one of the major peroxisome  
134 protein import receptors, which can bind cargo proteins containing peroxisomal targeting signal  
135 type 1 (PTS1) and deliver them to peroxisomal matrix through Pex13/Pex14 docking complex.  
136 After releasing its cargo in peroxisomal matrix, Pex5 will be poly- or mono-ubiquitinated  
137 through complex Pex2/Pex10/Pex12. Monoubiquitylated receptor is then released from the  
138 membrane by the ATPases of the ATPases associated with diverse cellular activities (AAA)  
139 family, Pex1 and Pex6<sup>34</sup> (Fig. 1A). In the cytosol, the ubiquitin moiety is removed and Pex5  
140 becomes available for another round of import. The polyubiquitylated Pex5 receptor is released

141 from peroxisome following the same way as the monoubiquitylated receptor, except that it is  
142 directed for proteasomal degradation<sup>34</sup>. Knocking down these genes have been shown to greatly  
143 impair peroxisome import in oenocytes and S2 cells<sup>19,35</sup>. We utilized oenocyte-specific  
144 GeneSwitch driver (*PromE<sup>GS</sup>-Gal4*)<sup>19</sup> to transiently knock down peroxin genes in adult stage.  
145 RU486 (mifepristone, or RU) was used to activate *PromE<sup>GS</sup>-Gal4* (+RU), whereas control  
146 genotype is the same, but with no RU feeding (-RU). After 5 days of RU activation, fly  
147 oenocytes are dissected and polyA-tailed RNA was isolated for downstream RNA sequencing  
148 and data analysis (Fig. 1A). To eliminate the transcriptional changes induced by RU feeding, we  
149 included a control group (*PromE-GS-gal4>yw*) for RNA-seq analysis.

150 To identify conserved pathways involved in peroxisomal stress responses, we have  
151 recently developed an inducible peroxisomal stress system in the mammalian cell culture. In this  
152 system, we knocked in a Tet-ON 3G tetracycline-inducible expression construct into the AAVS1  
153 safe harbor locus in human embryonic kidney-derived HEK293 cells (Fig. 2B). The expression  
154 construct contained a FLAG-tagged full-length human PEX5 with a single amino acid  
155 substitution at position 11 (cysteine to alanine, C11A), a conserved ubiquitination site involved  
156 in PEX5 recycling<sup>36</sup>. Stable expression of PEX5<sup>C11A</sup> mutant exerts dominant-negative effect on  
157 wild type PEX5 recycling and efficiently blocks peroxisomal import in mammalian cell culture  
158<sup>36</sup>. PEX5<sup>C11A</sup> protein level can be robustly induced by treating cells with doxycycline (Dox) at the  
159 concentration of 1 µg/ml, but not in wild type (Fig. 2C). Induction of PEX5<sup>C11A</sup> mutant was able  
160 to block GFP-PTS1 import into peroxisomes (marked by PEX14), without significantly affecting  
161 peroxisomal number (Fig. 1D-1F). To conduct RNA-seq analysis, PEX5<sup>C11A</sup> cells were treated  
162 with or without doxycycline for 72 hours prior for total RNA extraction. To directly compare  
163 similarity with Pex5 knockdown in *Drosophila* oenocytes, we transfected PEX5-targeting siRNA

164 or non-targeting siRNA into HepG2 cells for 72 hours prior to total RNA isolation. PolyA-tailed  
165 RNA was then isolated and RNA-seq libraries were constructed and pooled for the following  
166 analysis (Fig. 1G-1H).

167 *Distinct transcriptional profiling in Pex1, Pex12 and Pex5 knockdown in oenocytes*

168 To understand how peroxisomal stress induced by different peroxins' knockdown affect  
169 transcriptome, we conducted hierarchical cluster analysis across Pex1<sup>RNAi</sup>, Pex12<sup>RNAi</sup>, Pex5<sup>RNAi</sup>  
170 and yw control samples, using log<sub>2</sub> fold change value (RU treatment / no RU treatment) (Fig.  
171 2A). Intriguingly, we found three peroxin knockdowns produced distinct transcriptomic changes  
172 with very little similarities, as reflected on the heatmap (Fig. 2A) and PCA analysis  
173 (Supplementary Fig. 1A). The transcriptomic profile also varies between PEX5<sup>C11A</sup> and PEX5-  
174 siRNA in human cell culture (Supplementary Fig.1B). The little similarity between each gene  
175 knockdowns is possibly due to different methods of inducing peroxisome stress and different cell  
176 types used. Cluster 2 in Fig.2A represents genes that are highly induced by both Pex5 and Pex12  
177 and contains GO terms such as response to ER stress, carbohydrate metabolic process, glycogen  
178 biosynthetic process and lipid particle (Supplementary Fig 1C). Cluster 4 is enriched with genes  
179 specifically induced by RU feeding, which are involved in oogenesis, transcription, histone  
180 modification (Supplementary Fig.1D). These results are consistent with previous findings that  
181 mifepristone can regulate genes involved in X-chromosome gene expression and oogenesis<sup>37</sup>.  
182 Cluster 9 and 11, which contains genes commonly induced by Pex5 and Pex1, are enriched with  
183 GO terms including fatty acid beta-oxidation, mRNA splicing, protein folding, mitochondrial  
184 translation, and peroxisome. Induction of peroxisomal genes suggests there is retrograde  
185 signaling between peroxisome and nucleus. In cluster 10 and 12 contains genes induced by both



186 Pex1 and Pex12. These clusters contain genes involved in proteasome assembly, translation,  
187 mitochondrial electron transport and ribosome (Supplementary Fig1E – 1F).

188         There are 248 differentially expressed genes (DEGs) in Pex12 knock down from  
189 oenocytes ( $|\text{fold change}| \geq 1.2$ ,  $\text{FDR} \leq 0.1$ ), 254 DEGs induced by RU feeding. Both Pex5  
190 knockdown and Pex1 knockdown induced great transcriptional changes: Pex1 knockdown  
191 produced 1055 DEGs and Pex5 knockdown produced 1056 DEGs (Fig. 2B). Next, we ask what  
192 genes are commonly regulated by all Pexs' knockdowns and what genes are specifically  
193 controlled by individual Pexs. We compiled venn diagram using up-regulated DEGs across all  
194 Pex-knockdown samples and yw control group. Consistent with the heatmap analysis (Fig.2A),  
195 only 40 genes are commonly induced by all Pex knockdowns, but not in yw control group (Fig.  
196 2C), confirming the finding that these Pex knockdowns generate different transcriptional  
197 responses. To understand how each Pex genes specifically regulate transcriptions, we conducted  
198 GO term analysis on genes specifically induced by individual Pex knock downs. Pex5  
199 knockdown specifically induced 337 DEGs, which are enriched in glutathione, proteolysis, and  
200 oxidation-reduction processes. Pex12 knockdown specifically induced genes involved in glucose  
201 homeostasis and lipid metabolism. In contrast, Pex1 specifically induced genes involved in  
202 protein homeostasis process, such as proteasome, ribosome, and translation (Fig. 2D).

203         Next, we sought to understand the function of all the commonly induced genes. When we  
204 analyzed the function of these genes, we found 9.3% of them function in ER, 7% in Golgi, 7% in  
205 lysosome, 14% of them function in mitochondria (Fig. 2E). Majority of the peroxisome stress  
206 induced genes produce nucleus-localizing proteins (20.9%), suggesting alterations in nucleus  
207 under peroxisome stress. Surprisingly, only 1 peroxisome gene (*CG18003*) is altered by all three  
208 Pex knockdowns. Localization predication was based on published datasets on peroxisome and

209 mitochondria<sup>38,39</sup>, predicated localization on Flybase and human orthologues predication. From  
210 those mitochondrial genes, *COX7A* (cytochrome c oxidase subunit 7A) encodes a subunit for  
211 mitochondrial complex IV; *CG9512* encodes a glucose-methanol-choline oxidoreductase, its  
212 human orthologue *CHDH* (choline dehydrogenase) localizes to the outer membrane of  
213 mitochondria in a potential-dependent manner<sup>40</sup>. *CHDH* interacts with *SQSTM1*, a mitophagy  
214 adaptor molecule, and *CHDH* is required for mitophagy<sup>40</sup>. This suggests mitochondrial  
215 abnormalities and possibly mitophagies are induced under peroxisome import stress. *Spidey*, an  
216 oenocyte enriched gene essential for its growth and lipid metabolism, is also induced by  
217 peroxisome stress. Its human orthologue (very-long-chain 3-oxoacyl-CoA reductase, *HSD17B12*)  
218 is predicted to localize in the ER. *Spidey* is reported to be a 3-ketoacyl-CoA reduction for  
219 elongation of long chain fatty acids into VLCFAs and is also induced by peroxisome stress<sup>41</sup> (Fig.  
220 2E). Nucleus genes include *LamC* (*LMNA* in human), *CG6770* (*NUPRI* in human), which  
221 regulate nuclear envelope and chromatin organization, are also increased under peroxisome  
222 stress. *CG10383* (*SERAC1* in human) encodes a hydrolase involved in  
223 glycosylphosphatidylinositol metabolism is essential for both mitochondrial function and  
224 intracellular cholesterol trafficking. *CG10383* expression increased significantly under all Pex  
225 knockdowns (Fig. 2E). *CG7322* is orthologous to *Dicarbonyl/L-xylulose reductase (DCXR)* in  
226 human. It encodes a highly conserved enzyme converting L-xylulose into xylitol and it is  
227 important in carbonyl detoxification and carbohydrate metabolism<sup>42</sup>. *DCXR* is thought to play an  
228 important role in the glucuronic acid/uronate cycle of glucose metabolism. In this pathway,  
229 glucuronic acid is metabolized to form the pentose, L-xylulose. Subsequently, *DCXR* converts L-  
230 xylulose to xylitol which is shuttled into the pentose phosphate pathway. Highly induced  
231 expression of *CG7322* (*DCXR* orthologue) under peroxisome stress indicates altered pentose

232 phosphate or carbohydrate pathways. We verified the increased expression of *CG10383* and  
233 *CG7322* through RT-PCR (Supplementary Fig. 1G-H). Altogether, these data suggest that other  
234 organelles' homeostasis and metabolism are tightly controlled by peroxisomal and these changes  
235 can lead collaborative response against disruption of homeostasis.

236 Comparing to commonly induced genes, Pex knockdowns only commonly repressed the  
237 expression of 10 genes (Fig. 2F and Supplementary Fig. 1I-J). Among these 10 genes, 3 of them  
238 encode transferases (*CG1941*, *CG2781*, *CG14615*), which can transfer acyl groups other than  
239 amino acyl groups. *CG2781* (ELOVL fatty acid elongase) is predicated to mediate elongation of  
240 fatty acids into very-long-chain fatty acids. *Eaat1* (excitatory amino acid transporter 1), which  
241 encodes a transmembrane protein with glutamate-sodium symporter activity<sup>43</sup>, is also commonly  
242 repressed by all Pex knockdowns. Its function in oenocytes remain unknown. But glutamate  
243 transport could indirectly regulate the synthesis of antioxidant glutathione<sup>44</sup>, *Eaat1* might also  
244 regulate glutathione synthesis, thus regulating the redox level in oenocytes. We further analyzed  
245 the genes specifically repressed by individual Pex knockdowns. *Pex5* knockdown specifically  
246 repressed genes involved in maturation of small subunit ribosomal ribonucleic acid (SSU-rRNA).  
247 *Pex12* knockdown specifically induced glutamine metabolic process and nucleolus genes. *Pex1*  
248 knockdown repressed genes involved in mitotic cytokinesis, and defense response. Why *Pex1*  
249 regulates genes in mitotic cytokinesis? It is possibly because they perform other functions in  
250 oenocytes, such as cytoskeleton organization. Taken together, our Pex specific transcriptomic  
251 analysis revealed common distinct changes elicited by peroxisome stress in adult oenocytes.

252 **Peroxisomal stress induced endoplasmic reticulum genes and the integrated stress response**  
253 **(ISR)**

254 To further characterize peroxisome-stress induced signaling pathways, we performed  
255 Gene Set Enrichment Analysis (GSEA) on three Pex knockdown samples in *Drosophila*, using a  
256 collection of pre-defined gene sets retrieved from Kyoto Encyclopedia of Genes and Genomes  
257 (KEGG) database on *Drosophila Melanogaster*. Interestingly, Pex12 knockdown affected many  
258 pathways involved in RNA metabolism and processing, including RNA polymerase, RNA  
259 transport, RNA degradation and spliceosome (Table 1).

260 GSEA results showed all three Pex knockdown induced genes involved in DNA  
261 replication, which be because of disrupted reactive oxygen species (ROS) level, because ROS  
262 are well-known mediators of DNA and mitochondrial DNA damage<sup>45, 46</sup>. We also observed a  
263 decrease of ribosomal subunits, including mitochondrial ribosomes, in Pex5 knockdown.  
264 Consistent with this, down-regulation of Pex5 and Pex12 had a significant reduction on ribosome  
265 biogenesis (FDR < 0.0001, Table 1), suggesting dampened ribosome biogenesis. In addition,  
266 proteasome pathway is induced in Pex1 and Pex12 knockdowns (Table 1).

267 Among all three different Pex knockdowns, protein processing in endoplasmic reticulum  
268 pathway is up-regulated (Table 1). Density plot showed that comparing to total gene expression  
269 in respective RNAi, Pex5<sup>RNAi</sup>, Pex1<sup>RNAi</sup> and Pex12<sup>RNAi</sup> all showed a consistent, albeit modest  
270 increase of the expression level involved in ER pathway (Fig. 4A-4C). After examining the  
271 pathway closely, we identified nine genes that are commonly induced by all Pex RNAi (Fig. 4D).  
272 Some of these genes were not identified in previously venn analysis possibly because they did  
273 not reach the cut-off (FC ≥ 1.2, FDR ≤ 0.1). Interestingly, CG30156, CG3061, Ubc7, p47,  
274 Hsp70Ba and Hsp70Bb (highlighted in red) all participate in ER-associated degradation (ERAD).  
275 Among them, p47, Hsp70Ba and Hsp70Bb are highly induced in all Pex knockdowns, by which  
276 Hsp70Bb is induced by more than 6-fold in Pex1<sup>RNAi</sup>. p47 is predicted to have ubiquitin binding

277 activity and its human orthologue can interact with ubiquitinated substrates during ERAD and  
278 are elevated upon ER stress<sup>47</sup>. Similarly, several ubiquitin ligase complex components are also  
279 up regulated, such as sip3 (HRD1 family) and Der-1. The evidence suggests that there is higher  
280 level of unfolded proteins in the ER and induced ERAD activity under peroxisomal stress.

281 To test whether ER stress is induced under peroxisomal stress, we first examined the  
282 level of eIF2 $\alpha$  phosphorylation. Phosphorylation of eIF2 $\alpha$  on serine 51 reduces protein  
283 translation and diminishes the load of unfolded proteins entering ER<sup>48</sup>. It was observed that  
284 oenocyte-specific *Pex5* knockdown induced eIF2 $\alpha$  phosphorylation in oenocytes (Fig. 3E-F). As  
285 the level of PEX5<sup>C11A</sup> increased, the level of eIF2 $\alpha$  phosphorylation was also significantly  
286 increased in HEK293 mutant cell line (Fig. 3G-H). Addition of Doxycycline to WT cells did not  
287 induce the level of eIF2 $\alpha$  phosphorylation (Supplementary Fig. 2J). We utilized a previously  
288 developed *xbp1*-EGFP reporter to measure Ire-1-mediated splicing activity<sup>49</sup>. As reported  
289 previously, *xbp1* splicing is enhanced to produce in-frame EGFP in response to ER stress, after  
290 dithiothreitol (DTT) treatment (Supplementary Fig. 2K-L). However, the level of spliced *xbp1*  
291 was similar in control and *Pex5* knockdown flies (Supplementary Fig. 2K-L). Consistently, the  
292 level of spliced XBP1 was similar in PEX5<sup>C11A</sup> mutant cell line treated with Doxycycline  
293 compared with control (Supplementary Fig. 2M). 5' and 3' primers were set at the positions 412  
294 and 853 of human XBP1 mRNA, so that the amplified fragment would produce a band at 442 bp  
295 and spliced band at 426 bp under thapsigargin-induced ER stress<sup>50</sup>. Altogether, the data showed  
296 that peroxisome import defect increased the expression of ER, ERAD genes and induced ISR  
297 independent of *ire-1-xbp1* pathway.

298 **Peroxisome dysfunction represses oxidative phosphorylation and induced inflammation,**  
299 **cholesterol metabolic pathway in human cells**

300 To understand how peroxisome stress changes transcriptions in human cell cultures, we  
301 performed GO term analysis on DEGs ( $|\text{fold change}| \geq 1.2$ ,  $\text{FDR} \leq 0.1$ ) from PEX5<sup>C11A</sup> and  
302 PEX5-siRNA treated cells. PEX5-siRNA treatment produced 587 DEGs, whereas PEX5<sup>C11A</sup>  
303 elicited dramatic transcriptional response, with 7393 DEGs. Interestingly, these two treatments  
304 share few common transcriptional changes: 26 genes commonly induced versus only 6 genes  
305 commonly repressed by two treatments (Fig. 3A). Among these 26 commonly up-regulated  
306 genes (Supplementary Fig.1G), majority of them regulates cell proliferation (CCNA2, FGFR3,  
307 CDCA5, PSMB9 and UBA7) and mitochondrial metabolism (PCK1, ACSM3, ALDH8A1 and  
308 BTG2). We examined the specific genes induced by PEX5<sup>C11A</sup> and PEX5-siRNA. PEX5<sup>C11A</sup>  
309 specifically induced immune response, RNA metabolism, nitrogen metabolism (Fig. 3B),  
310 whereas PEX5-siRNA specifically induced peroxisome genes, cholesterol homeostasis, steroid  
311 metabolism, carboxylic acid metabolism and lipid metabolism (Fig. 3C). PEX5<sup>C11A</sup> represses  
312 mitochondrial genes, translation, ribosome biogenesis. PEX5-siRNA represses negative  
313 regulation of protein phosphorylation and MAPK cascade, indicating an induction of MAPK  
314 signaling under PEX5 knockdown, which is consistent with previous findings in oenocytes<sup>19</sup>.

315 To further characterize peroxisome-stress induced signaling pathways, we performed  
316 GSEA, using a collection of pre-defined gene sets retrieved from KEGG database on *Homo*  
317 *Sapiens*. PEX5<sup>C11A</sup> significantly regulated 103 signaling pathways, whereas only 2 pathways are  
318 significant under PEX5-siRNA ( $\text{FDR} \leq 0.05$ ). Through GSEA analysis, we found oxidative  
319 phosphorylation pathway and valine leucine and isoleucine degradation pathway are  
320 downregulated under PEX5<sup>C11A</sup> treatment (Table 2 and 3G). In oxidative phosphorylation  
321 pathway, we found that key components of Complex I-IV of the respiratory chain are down-  
322 regulated. For example, NADH dehydrogenase: NDUFV1, NDUFV2, NDUFS2, NDUFS3,

323 NDUFS4, NDUFS6, NDUFS7, NDUFS8 and NDUFSA11, which are components of Complex I  
324 and deficiency of which is the most common cause of mitochondrial disease<sup>51</sup>. Cytochrome C1  
325 (CYC1) which is part of the metal centers responsible for electron transfer in complex III, is also  
326 downregulated. Almost all cytochrome c oxidase (COX, complex IV) subunits are repressed  
327 (COX4I1, COX4I2, COX5A, COX5B, COX6A1, COX6B1, COX6C, COX7A1, COX7A2,  
328 COX7A2L, COX7B, COX7C, COX8A and COX15) and many ATPase subunits (ATP6V1G2,  
329 ATP6V0C, ATP6V1G1 etc.) are repressed as well. These results suggest that mitochondrial  
330 electron transport activity is greatly impaired under peroxisomal stress, which is consistent with  
331 previous publications<sup>52-54</sup>. Even though we did not observe decreased oxidative phosphorylation  
332 genes in *Drosophila* oenocytes, we observed an altered mitochondria morphology with higher  
333 fusion activity under Pex5 knockdown in oenocytes (unpublished observation). This indicates  
334 peroxisome and mitochondria are dynamically connected organelles and the response to  
335 peroxisome stress is conserved between flies and human.

336 It has been well established that defects in electron transport chain leads to elevated  
337 reactive oxygen species (ROS) and can induce inflammatory pathways<sup>55 56</sup>. Interestingly, we also  
338 observed activated MAPK signaling, type II diabetes mellitus under PEX5<sup>C11A</sup> treatment (Table  
339 1). Pex5 knockdown was previously identified to activate MAPK/JNK signaling in *Drosophila*  
340 *41 Hawthorne St #1* oenocytes<sup>19</sup>, this suggests a conserved cellular response from peroxisome  
341 stress between flies and human. In addition, we also observed an upregulation of HIPPO  
342 pathway, including key regulators such as MOB1B, LATS1/2, YAP1. HIPPO pathway which is  
343 originally discovered for its regulation on organ size. However, recent evidence has discovered  
344 that Hippo signaling is also involved in oncogenesis<sup>57, 58</sup> as well as apoptosis<sup>59-65</sup>. Peroxins  
345 mutants exhibit enhanced cell apoptosis and cell death<sup>66</sup> (based on unpublished data), our

346 evidence suggest that peroxisome stress induced by PEX5<sup>C11A</sup> activates apoptosis through  
347 HIPPO signaling activation.

348 PEX5-siRNA treatment produced less significant GSEA pathways comparing to  
349 PEX5<sup>C11A</sup>, with only spliceosome showing significant negative correlation with age (NES = 1.85,  
350 FDR = 0.03). Spliceosome and RNA processing are also negatively correlated with age in  
351 human<sup>67</sup>. which suggests that peroxisome defects are one of the causes for tissue aging.

352 According to GSEA analysis, under PEX5-siRNA induced genes involved in cholesterol  
353 metabolism pathway (NES = -1.45, P-value = 0.019) (Fig. 3F). Among the upregulated genes in  
354 the pathway, apolipoprotein genes are highly induced, including APOC1, APPOA1, APOA5 and  
355 APOC3 (Fig. 3M). APOC3 had a significant 5-fold increase after PEX5 knockdown (Fig. 3M).

356 Apolipoproteins are crucial for lipoprotein metabolism. Not only can guide lipoprotein formation,  
357 they also serve as activator or inhibitors of enzymes involved in lipoprotein metabolism<sup>68</sup>.

358 Notably, single-nucleotide polymorphisms within the apolipoprotein (APO) gene cluster, which  
359 includes APOA1/C3/A4/5 genes, are strong risk alleles associated with hypertriglyceridemia and  
360 increased coronary heart disease (CHD) risk in humans<sup>69, 70</sup>. APOA5 encodes a protein which is

361 secreted into plasma to control plasma triglyceride (TG) metabolism by acting as an activator of  
362 lipoprotein lipase, thus promoting TG catabolism<sup>71</sup>. In contrast, APOC3 encodes a protein that

363 acts as an inhibitor of lipoprotein lipase and high expression of APOC3 have been associated  
364 with increased plasma level of TG and hypertriglyceridemia<sup>72</sup>. Interestingly, APOC3 protein is

365 also a modulator for pro-inflammatory pathways, such as PKC $\beta$  and NF- $\kappa$ B in endothelial cells.

366 It is interesting that both APOC3 and APOA5, which have opposing effects on TG, all are

367 induced under PEX5-siRNA. Pex5 perturbation's effects on plasma TG require further

368 investigations. Many of pathway regulations are cell type or treatment specific. Despite of these



369 differences, we were able to identify several pathways, including MAPK, mitochondrial  
370 oxidative phosphorylation, elevated ISR as conserved response to peroxisome dysfunction.

371 **GSEA uncovers ribosome biogenesis declines as a conserved response in the peroxisomal**  
372 **defects**

373 To identify conserved response to peroxisomal stress, we compared the GSEA results in  
374 *Drosophila* oenocytes and in human cells. GSEA showed a conserved downregulation of genes  
375 functioning in the KEGG pathway ribosome biogenesis in Pex5<sup>RNAi</sup>, Pex12<sup>RNAi</sup> (*Drosophila*  
376 oenocytes) and PEX5<sup>siRNA</sup> in human cells (Fig. 5A and Supplementary Fig. 2A). As shown by  
377 density plots (Fig. 5A), most of genes in the ribosome biogenesis gene set showed a consistent,  
378 although modest, decrease in the expression level between knockdown and control, compared to  
379 total gene expression (Fig. 4A-B and Supplementary Fig. 2D-F). A similar trend was observed  
380 with ribosome gene set (Fig. 5B), with a decrease in ribosome genes in PEX5<sup>C11A</sup> and Pex5<sup>RNAi</sup>,  
381 including majority of genes encoding mitochondrial ribosomal proteins and ribosomal proteins.  
382 Even though RU feeding also induced the ribosome pathway, however the heatmap showed RU  
383 and Pex5<sup>RNAi</sup> showed few similarities on the expression level (Supplementary Fig. 2B).

384 A closer look on ribosome biogenesis pathway revealed that multiple steps regulating the  
385 process are repressed. Peroxisomal stress from three different knockdowns all target on 60S  
386 ribosome processing and 90S pre-ribosome components (Fig. 5C). The eukaryotes contain two  
387 ribosome subunits, the 40S (small) and the 60S (large), which contain four rRNA species (18S,  
388 5.8S, 25S and 5S) and ribosomal proteins (RPs). Ribosome assembly starts in the nucleolus by  
389 transcribing a large precursor rRNA (47S pre-rRNA in *Drosophila* and mammals) by RNA  
390 polymerase I, from which the mature 18S, 5.8S, and 25S rRNAs are generated<sup>27</sup>. Our results  
391 show multiple steps during ribosome processing are affected under Pex knockdown. For example,

392 NOP58, a core component of the box C/D small nucleolar ribonucleoprotein complex, which  
393 controls specific pre-ribosomal RNA processing, is downregulated in PEX5<sup>RNAi</sup> in human cells.  
394 Its fly orthologue, nop5, is also repressed under Pex12<sup>RNAi</sup> in oenocytes. Ribosome biogenesis  
395 protein BMS1 homolog (BMS1), which is crucial for 40S maturation are repressed in human  
396 PEX5<sup>RNAi</sup>, same with its orthologue in flies. Additionally, elongation factor like GTPase 1 (EFL1)  
397 can assist the release of eukaryotic translation initiation factor 6 (eIF6) release from 60S-  
398 ribosome<sup>73, 74</sup>. Thus, it plays an important role in translational activation. CG33158 is the fly  
399 orthologue of EFL1. Interestingly, we found reduced expression level of CG33158 in Pex5<sup>RNAi</sup>  
400 and Pex12<sup>RNAi</sup> in oenocytes, suggesting the translation activity is dampened under peroxisome  
401 stress.

402         During ribosome biogenesis, the 47S pre-rRNA assembles co-transcriptionally with  
403 various *trans*-acting factors and early binding ribosomal proteins of the small subunit. Together a  
404 huge macromolecular complex, named 90S pre-ribosome or small-subunit (SSU) processome  
405 will form<sup>26, 29, 30</sup>. 90S pre-ribosome is composed of 60-70 non-ribosomal factors, with most being  
406 called U three proteins (Utp)<sup>26</sup>, and they can form structurally autonomous subcomplexes (UTP-  
407 A, UTP-B, UTP-C, Mpp10-Imp3-Imp4, U3 snoRNP, and Bms1-Rcl1 modules). These modules  
408 will associate with pre-rRNA in a sequential and hierarchical order<sup>75-77</sup>. UTP-A and UTP-B are  
409 the earliest 90S modules that assemble on the 5'-external transcribed spacer (ETS) of the pre-  
410 rRNA, whereas UTP-C and other complexes bind later. It has been reported that UTP-A complex  
411 is critical for the initial cleavage of 5'ETS site on 47S pre-rRNA, thus regulating the ribosome  
412 biogenesis<sup>78</sup>. We found multiple genes in SSU processome are downregulated under peroxisome  
413 stress. UTP15 small subunit processome component (UTP15), nucleolar protein 6 (NOL6),  
414 PWP2 small subunit processome (PWP2), are all repressed in PEX5<sup>RNAi</sup> in human cells or their

415 fly orthologues are repressed in oenocytes. Because UTP-A, UTP-B and UTP-C components are  
416 largely dampened under peroxisomal stress, we sought to verify whether peroxisomal stress also  
417 caused pre-rRNA processing, especially at the 5'-ETS removal steps.

418 pre-rRNA processing starts with the removal of the 5' and 3'-ETS, and the internal  
419 transcribed spacers 1 and 2 (ITS1 and ITS2, respectively) (Fig. 6A). To test whether pre-rRNA  
420 processing is impaired under peroxisomal stress, we designed primers against the 5'-ETS region  
421 and 3'-ETS regions in Pex5<sup>RNAi</sup> oenocytes and PEX5<sup>C11A</sup> induced human cells (Fig 6A). We  
422 discovered strong accumulation of higher level of 5'-ETS and ITS1 could indicate a defect in  
423 rRNA processing, or induced level of rRNA transcription (Fig. 6B-6C). Next, we measured  
424 uncleaved ETS using primer 1 and 2 as shown in figure 6A, normalized to 18S (primer 3 and 4)  
425 which represents total level of rRNA transcribed<sup>79</sup>. Higher relative expression value is indicative  
426 of accumulated unprocessed rRNA. Pex5 knockdown specifically in oenocytes can increase the  
427 fraction of 5'ETS-18S unprocessed rRNA (Fig. 6D), without significantly affecting the total  
428 rRNA level (Fig.6E). We also found a consistent increase of unprocessed rRNA in human cells  
429 after PEX5<sup>C11A</sup> induction, but not 18S level (Fig. 6G-6H). To further verify whether ribosome  
430 synthesis is impaired, we measured the localization of ribosomal protein S6 (Rps6) under  
431 peroxisomal stress. The rationale for this assay is based on the observation that defects in  
432 biogenesis pathway can cause ribosomal subunit export defects<sup>80, 81</sup>. Rps6 is an early assembling  
433 40S subunit ribosomal protein<sup>82-84</sup>, allowing us to score early defects in 40S synthesis. Indeed,  
434 we found an accumulation of RPS6 in the nucleus in Pex5<sup>RNAi</sup> oenocytes, after normalized to  
435 total intensity (Fig. 6I – 6J). We also identified higher percentage of cells contain nucleus rpS6  
436 signal in PEX5<sup>C11A</sup> expressing human cells, comparing to control (Fig 6K-6L). These results

437 indicate a defect in rRNA processing, instead of increased rRNA transcription, under peroxisome  
438 disruption.

439

## 440 **Discussion**

441 The peroxisome is the important metabolic site to perform  $\beta$ -oxidation of fatty acids and  
442 the degradation of toxic hydrogen peroxide, yet it has received little respect until now. Although  
443 peroxisomal dysfunction has been linked to severe diseases in man and aging<sup>15, 17, 19, 85</sup>, whether  
444 cells can mount defensive mechanism and how cells respond to peroxisome stress remain to be  
445 determined. Here we characterized a variety of transcriptional alterations under multiple  
446 peroxisomal stress in both *Drosophila* oenocytes and human cell cultures. We show that defects  
447 in peroxisome import process can elicits distinct transcriptional response in *Drosophila*  
448 oenocytes. Peroxisomes are highly interconnected with other organelles, such as ER and  
449 mitochondria, so that peroxisome dysfunction can induce gene expression targeting to other  
450 organelles. Specifically, peroxisome defects in oenocytes up-regulates genes involved in ER and  
451 ERAD. PEX5<sup>C11A</sup> induction induced genes involved in oxidative phosphorylation and altered  
452 mitochondrial ribosome genes' expression. PEX5<sup>RNAi</sup> specifically up-regulated genes involved in  
453 cholesterol metabolism and transport. We also identified conserved decrease in ribosome  
454 biogenesis and ribosome between *Drosophila* and human cells, highlighting it as a direct and  
455 crucial mechanism to peroxisome stress.

456

## 457 **Different importing peroxins control distinct transcriptional processes**

458 Maintaining peroxisomal activity is a highly dynamic and complicated process,  
459 facilitated by peroxisomal biogenesis factors (peroxins). In fact, most of the peroxins identified  
460 so far are known to be directly involved in different stages of peroxisomal matrix protein import

461 <sup>86</sup>. Newly synthesized and folded peroxisome proteins from cytosol are targeted to the organelle  
462 in a post-translational manner<sup>86</sup>. The protein import process into peroxisome is involved with  
463 multiple steps, including cargo recognition, docking of the cargo/receptor- complex at the  
464 peroxisome membrane, cargo translocation, cargo release into the peroxisomal matrix and  
465 receptor recycling (Fig. 1A). Disrupting key regulators during these processes can compromise  
466 the peroxisome import activity and lead to severe physiological consequences<sup>19,35</sup>, including  
467 development of PBDs. Even though these Peroxin genes work cooperatively to maintain  
468 peroxisome activity, it remains unknown whether their sole activity is to regulate peroxisome  
469 biogenesis.

470         Interestingly, our transcriptomic analysis on multiple import-regulatory genes (*Pex5*,  
471 *Pex12* and *Pex1*) suggests that they may regulate other cellular processes. First, we found that  
472 *Pex1* and *Pex5* RNAi produced high level of transcriptional changes comparing to *Pex12* (1055  
473 and 1056 DEGs versus 248 DEGs). This might be because the severity of peroxisome import is  
474 different, because *Pex12* dsRNA in S2 human cells show less diffusion of cytosolic GFP-PTS  
475 comparing to *Pex1* and *Pex5*<sup>35</sup>. However, both our GO ontology and GSEA analysis suggest that  
476 even *Pex1* and *Pex5* knockdown induced different genetic pathways. *Pex5* knock down induced  
477 GO terms related to oxidation-reduction and glutathione pathways, whereas *Pex1* dramatically  
478 induced genes involved in translation, ribosome, and proteasome (Table 1). The discrepancies in  
479 their transcriptomic profiles, despite sharing the same phenotype in peroxisome import, suggest  
480 that they regulate different processes other than *Pex5* recycling. *Pex1* and *Pex6* both belong to  
481 the AAA ATPase family, which is known to be involved in protein quality control, including  
482 folding, assembly, transport, and protein degradation<sup>87</sup>. This could explain the induction of  
483 translation and proteasome in *Pex1*<sup>RNAi</sup>. *Pex1*, *Pex15* and *Pex6* will form an exportomer and

484 deficiency of these components can trigger pexophagy in mammalian cells<sup>88</sup>. Another study  
485 found that a missense mutation of Pex1 can ameliorated the defects of Pex6 mutant without  
486 restoring PEX5 recycling, possibly through prevention of pexophagy, suggesting other functions  
487 Pex1-Pex6 complex<sup>89</sup>. In support of this view, studies have unexpectedly identified *PEX6*  
488 regulating mitochondrial inheritance in daughter cells in yeast. Seo et al. showed that PEX6  
489 overexpression was able to rescue the deficit in Atp2p (the  $\beta$ -subunit of mitochondrial F<sub>1</sub>, F<sub>0</sub>-  
490 ATPase<sup>90</sup>) mutant by improving its import into mitochondria. Studies suggest that Pex1 was  
491 able to translocate between mitochondria and peroxisomes<sup>91</sup>, where they showed that  
492 mitochondria localized PEX6-PEX1-PEX26 complex can rescue PEX26 deficient cells.  
493 Altogether, our findings provide new insights in peroxisome biogenesis disorders, peroxins  
494 functions and their significance of other organelles' activities.

#### 495 **Peroxisome and inter-organelle communications**

496 To optimize their activities, peroxisomes must coordinate with other organelles  
497 frequently. No peroxisome is in isolation. A growing body of evidence showed that peroxisome  
498 share physical membrane contact sites with other organelles (see an excellent review here<sup>4</sup>).  
499 This suggests there is intimate interaction between peroxisomes with these organelles, which is  
500 important for controlling processes such as metabolism and organelle proliferation. In agreement  
501 of this concept, we identified changes of gene expression for other organelles, especially for ER  
502 and mitochondria, under various Pex knockdowns.

503 Our results of PEX5<sup>RNAi</sup> in HepG show significant up-regulation of cholesterol  
504 metabolism (Fig. 3C and 3F). Previous study shows that cholesterol accumulates drastically in  
505 animals and human patients with peroxisomal disorders, as a result of disrupted peroxisome-  
506 lysosome contact sites<sup>92</sup>. The majority of cellular cholesterol (60% - 80%) is localized at the

507 plasma membrane (PM)<sup>93</sup>. Cholesterol is synthesized in the ER or it can be imported  
508 exogenously and stored in the lysosome. Cholesterol can be transported from the ER and  
509 lysosome to the PM. Recently it was shown that peroxisome mediates the transfer of cholesterol  
510 from lysosome to PM. A peroxisome-lysosome contact site was shown to be required for this  
511 transport<sup>92</sup>. An up-regulation of cholesterol metabolism genes could be a compensatory  
512 mechanism to degrade excess cholesterol accumulated inside the cells.

513 Besides lysosome, peroxisomes also actively interact with ER and mitochondria. Our  
514 results show that mitochondrial ribosomal subunits are repressed under Pex5 knockdown in  
515 oenocytes (Table 1), as well as in PEX5<sup>C11A</sup> mutant (Table 2). Consistently, genes involved in  
516 oxidative phosphorylation are largely repressed in PEX5<sup>C11A</sup>, which was also been observed in  
517 Pex16 KO<sup>94</sup>. Our results suggest that mitochondria function is altered under peroxisome stress.  
518 In fact, previous studies as well as our observation have found that mitochondria underwent  
519 functional and morphological changes under Pex5 and Pex16 deficiencies<sup>94,95</sup>. In these studies,  
520 they consistently observed a more fused mitochondria structure, reduced level of the respiratory  
521 chain activities. Park et. al identified that peroxisome-derived phospholipids are responsible  
522 peroxisome dysfunction induced mitochondrial abnormalities<sup>94</sup>. Park et. al inhibited  
523 plasmalogen synthesis by knocking down expression of GNPAT, an enzyme responsible for the  
524 first step in plasmalogen production. GNPAT knockdown was able to recapitulate phenotypes  
525 with Pex16 knockdown, including altered mitochondrial morphology and decreased mtDNA.  
526 Interestingly, they also found dietary supplementation of plasmalogen precursors can rescue  
527 thermogenesis in Pex16-KO mice. However, whether plasmalogen level is the sole contributor to  
528 mitochondrial dysfunction and why there are tissue specific mitochondria abnormalities under  
529 peroxisome deficiency, these questions still require investigation.

530 Our results suggest different Pex knockdowns commonly induce genes VLCFA  
531 synthesis, whose protein products can localize on ER (e.g. *spidey* and *Cyp6g1*). Biosynthesis of  
532 VLCFA takes place at the ER and can be metabolized in peroxisomes<sup>96,97</sup>. Our findings suggest  
533 two organelles work closely to regulate metabolism of VLCFA. EM images showed that two  
534 organelles are adjacent to each other and that ER membrane can wrap around peroxisomes<sup>98-101</sup>.  
535 In fact, peroxisome-ER crosstalk is important for many lipid-related metabolic pathways,  
536 including the biosynthesis of ether-phospholipids, production of polyunsaturated fatty acids, bile  
537 acids, isoprenoids, and cholesterol.

538 Interestingly, we found peroxisome dysfunction in oenocyte cells can trigger protein  
539 process pathway in the ER and ERAD (including CG30156, CG30161, Ubc7, p47, Hsp70Ba and  
540 Hsp70Bb), which is possibly due to elevated ER stress (Fig. 3). Consistently, it has been  
541 previously identified that peroxisome-deficient *Pex2* and *Pex5* knockout mice had elevated level  
542 of ERAD gene expression, ER stress and ER abnormalities, prominently through PERK  
543 activation<sup>95,102</sup>. How does peroxisome dysfunction lead to the ER stress? Possible reasons  
544 include perturbed flux of mevalonate metabolites, changes in fatty acid levels or composition and  
545 increased oxidative stress<sup>103</sup>. Specific induction of PERK under peroxisome stress, not  
546 activation of Xbp1 splicing, suggesting peroxisome stress induced a specific cellular response  
547 distinct from protein misfolding induced ER stress. Genetic experiments and biochemical assays  
548 should be utilized to discern the nature of peroxisome induced ER stress.

#### 549 **Peroxisome in ribosome biogenesis and protein homeostasis**

550 Our results identified decreased transcription on ribosomal proteins and ribosome  
551 biogenesis factors, as a conserved response to peroxisome stress between humans and  
552 *Drosophila*. This is also the first study to verify the reduced ribosome biogenesis under *Pex5*<sup>RNAi</sup>



553 in oenocytes and PEX5<sup>C11A</sup> mutant in human cells. Our results show that the 5' cleavage process  
554 is inhibited under Pex5 knockdown. Our result indicates that peroxisome defects may  
555 specifically regulate ribosome biogenesis by altering ribosome biogenesis process, which might  
556 be more efficient in dealing with transient stress. In addition, we also observed an accumulation  
557 of RPS6 in the nucleus under Pex5 stress, which is often an indicator of ribosome biogenesis  
558 defects, specifically involved with 40S maturation process<sup>80</sup>. However, it is highly possible that  
559 60S maturation is also affected, judged by down-regulated expression of several crucial genes:  
560 Midasin (MDN1)<sup>104</sup>, GTPBP4<sup>105, 106</sup> and EFL1<sup>73, 74</sup>. Overall, our results indicate a down-  
561 regulation of ribosome availabilities, and possibly lower translational activities under  
562 peroxisome stress.

563         Why multiple peroxisome defects converge to impair ribosome biogenesis? It is possible  
564 that nucleolus is sensitive to peroxisomal or mitochondrial ROS level, which can hamper the  
565 function of ribosome biogenesis proteins that primarily localize in the nucleolus. However, very  
566 little is known on what stresses can alter nucleolus protein activity or composition. Further  
567 research is needed to investigate this area.

568         It has been well established that reduced ribosome proteins and ribosome biogenesis  
569 factors can increase longevity in model organisms (see<sup>23</sup> for review). The evidence also suggest  
570 that reduced ribosome biogenesis is a protective mechanism to confer peroxisomal stresses.  
571 Being a regulator of ribosome biogenesis, Pex5's effect on lifespan had been controversial. In  
572  $\Delta$ pex5 yeast cells, there was a strong reduction in chronological lifespan<sup>20</sup>. However, post  
573 developmental knockdown of prx-5, a *C. elegans* homolog for mouse *Pex5*, increased the  
574 worm's lifespan<sup>21, 22</sup>. The paradoxically increased lifespan by peroxisome disruption could be  
575 attributed to decreased level of ribosome and translational activities. It will be interesting to see

576 whether post developmental knockdown of Pex5 in oenocytes can also prolong lifespan through  
577 the regulation on ribosome biogenesis. In addition, how peroxisome import defect reduces  
578 ribosome biogenesis will be an interesting avenue to investigate.

## 579 **Methods**

### 580 **Plasmid Construction**

581 Human Pex5 cDNA from the Mammalian Gene Collection (MGC) was purchased from  
582 Dharmacon. The hPEX5 was amplified by PCR using the forward and reverse primers (5'-  
583 CACTATAGGGAGACCCAAGCTTATCTAGACATGGCAATGCGGGAGCT-3' and 5'-  
584 TCTTACTTGTCATCGTCGTCCTTGTAGTCGCCCTGGGGCAGGCC-3') and introduced  
585 between XhoI and BamHI sites in c-Flag pcDNA3 (addgene #20011) to generate Flag-tagged  
586 hPEX5 using NEBuilder® HiFi DNA assembly Master mix (New England Biolabs). Site-  
587 directed mutagenesis for amino acid substitution was performed using the Q5® Site-directed  
588 mutagenesis kit (New England Biolabs) according to the manufacture's instruction. The primers  
589 for C11A mutant were 5'-GGAGGCCGAAgctGGGGGTGCCAACC-3' and 5'-  
590 ACCAGCTCCCGCATTGCC-3'.

591 To generate Tetracycline inducible PEX5C11A plasmid, we modified pMK243 (Tet-  
592 OsTIR1-PURO) from Masato Kanemaki (Addgene #72835). pMK243 was digested by BgIII and  
593 MluI to remove OsTIR sequence. Flag-PEX5C11A was amplified by PCR using the forward and  
594 reverse primers (5'- gattatgatcctctagacatagctgcagattactgtcatcgtcctttagt-3' and 5'-  
595 tcctaccctcgtaaagaattcgcgccgcaatggcaatgcgaggagctggt-3') and introduced between BgIII and  
596 MluI sites in digested pMK243 plasmid to generate Tet-PEX5C11A-PURO plasmid. All  
597 plasmids are confirmed by Sanger sequencing.

### 598 **Generation of CRISPR Knock-in HEK293 cells expressing PEX5C11A**

599 HEK293 cells were maintained in Dulbecco's Modified Eagle Medium containing 10%  
600 fetal bovine serum (FBS), with penicillin and streptomycin. To generate stable cell line, we  
601 followed the protocol described in Natsume et al.  $1 \times 10^6$  HEK293 cells were plated in one well  
602 of a 6-well plate. After 24hrs, 800ng of AAVS1 T2 CRISPR in pX330 (Addgene #72833) and  
603 1ug of Tet-PEX5C11A-PURO were transfected using Effectene (Qiagen) according to the  
604 manufacturer's instructions. After 48hrs, the cells were detached and diluted at 10 to 100 times  
605 in 10ml of medium containing 1ug/ml of puromycin and transferred to 10 cm dishes. The  
606 selection medium was exchanged every 3 to 4 days. After 8 to 10 days, colonies were marked  
607 using a marker pen under a microscope, picked by pipetting with 10ul of trypsin-EDTA, and  
608 subsequently transferred to a 96-well plate. 100ul of the selection medium was added. When the  
609 cells were confluent, they were transferred to a 24-well plate. After 2-3 days, the cells were  
610 transferred to a 6-well plate. After 2-3 days, cells were detached and half of the cells were  
611 frozen, and the rest were used for genomic DNA preparation.

#### 612 **Genomic DNA isolation and PCR**

613 To prepare genomic DNA, cells were lysed in buffer A solution (100mM Tris-HCl  
614 [pH7.5], 100mM EDTA, 100mM NaCl, 0.5% SDS) followed by incubation at 65°C for 30min.  
615 Buffer B (1.43M potassium acetate, 4.28M lithium chloride) was added and incubated on ice for  
616 10min. After centrifuge at 12,000 rpm for 15 min, the supernatant was transferred to new  
617 microtube and added isopropanol. After isopropanol precipitation, DNA pellets were washed in  
618 70% ethanol and resuspended with DNase-free Water.

619 To verify Tet-PEX5C11A-PURO insertion into AAVS1 locus, genomic PCR was  
620 performed using Q5® High-Fidelity DNA polymerase (New England BioLabs) according to the  
621 manufacturer's instruction. 5'-cgtttcttaggatggccttc-3' and 5'-agaaggatggagaaagagaa-3' were used

622 for WT cell validation. 5'-cgtttcttaggatggccttc-3' and 5'-ccgggtaaactctccagagga-3' were used for  
623 Tet-PEX5C11A-PURO integration.

624 To test Xbp1 splicing activity, control cells (-DOX) or PEX5<sup>C11A</sup> expressing (+DOX)  
625 cells' total RNA was prepared and amplified by RT-PCR to detect spliced XBP1 mRNA<sup>50</sup> (5'-  
626 CCTTGTAGTTGAGAACCAGG-3' and 5'-GGGGCTTGGTATATATGTGG-3') or GAPDH  
627 mRNA (5'- accatcttccaggagcgaga-3' and 5'- gggccatccacagtcttctg-3'). Resulting products were  
628 subjected to 2% agarose gel electrophoresis.

### 629 **Fly husbandry and strains**

630 The following RNAi lines were used in the KD experiments: y[1] v[1]; P{y[+7.7]  
631 v[+t1.8]=TRiP.HMJ21920}attP40 (BDSC # 58064, Pex5 RNAi), y[1] sc[\*] v[1] sev[21];  
632 P{y[+7.7] v[+t1.8]=TRiP.HMC03536}attP2/TM3, Sb[1] (BDSC # 53308), y[1] v[1]; P{y[+7.7]  
633 v[+t1.8]=TRiP.HM05190}attP2 (BDSC # 28979). The control line used for the KD experiments  
634 is yw, a gift from Rochele Lab. All fly lines are crossed to oenocyte specific gene-switch driver  
635 (yw; PromE800-GS-gal4/Cyo;+), a gift from Heinrich Jasper.

636 Female flies were used in all experiments. Flies were maintained at 25°C, 60% relative  
637 humidity, and 12-h light/dark cycle. Adults and larvae were reared on a standard cornmeal and  
638 yeast-based diet, unless otherwise noted. The standard cornmeal diet consists of the following  
639 materials: 0.8% cornmeal, 10% sugar, and 2.5% yeast. RU486 (mifepristone, Fisher Scientific)  
640 was dissolved in 95% ethanol, and added to standard food at a final concentration of 100 μM  
641 for all the experiments. Gene KD or overexpression was achieved by feeding flies on RU486  
642 food for 5-6 days, before RNA isolation.

### 643 **Fly oenocyte RNA isolation**

644 Adult tissues oenocytes (20 females per replicate) were all dissected in cold 1××PBS  
645 before RNA extraction. For oenocyte dissection, we first removed FB through liposuction and  
646 then detached oenocytes from the cuticle using a small glass needle. Tissue lysis, RNA  
647 extraction was performed using RNeasy Micro kit from QIAGEN (catalog number 74034) with  
648 the following modifications. Samples were first collected in 1.7ml centrifuge tubes. Dissected  
649 tissues were saved in 150ul of Buffer RLT (a component of RNeasy kits) with 143mM β-  
650 mercaptoethanol on ice during the dissection. Samples were then put at room temperature for 3  
651 minutes prior to lysis and centrifuged at 7.5xg for 3minutes. Additional 150ul buffer RLT was  
652 added and pellet pestle grinder (Kimble pellet pestles, catalog number 749540-0000) was used to  
653 lyse the tissue for 1 minutes. 20ng carrier RNA was added to the cell lysates. Freezed samples  
654 was thawed in 37°C water bath for 1 minute. Total RNA was extracted using RNeasy Plus Micro  
655 columns following company manual.

#### 656 **Drosophila oenocyte RNA-seq library construction and sequencing**

657 RNA-seq libraries were constructed using 100 ng of total RNA and NEBNext Ultra II  
658 RNA Lib Prep (NEB, Ipswich, MA, USA. Catalog number: E7770L). RNA concentrations were  
659 measured using Qubit RNA BR Assay Kit (Thermo Fisher Scientific, catalog number: 10210).  
660 Poly(A) mRNA was isolated using NEBNext Oligo d(T)25 beads and fragmented into 200nt in  
661 size. Purification of the ligation products are performed using Beckman Coulter AMPURE XP  
662 (BECKMAN COULTER, catalog number: A63880). After cDNA synthesis, each cDNA library  
663 was ligated with a NEBNext adaptor and barcoded with an adaptor-specific index (NEBNext®  
664 Multiplex Oligos for Illumina, NEB, catalog number: E7335S). Twelve libraries were pooled in  
665 equal concentration and sequenced using Illumina HiSeq 3000 platform (single end, 150bp reads  
666 format).

667 **Human cells library preparation**

668 HEK293 expressing Tet-PEX5C11A-Puro cells were cultured in Dulbecco's Modified  
669 Eagle Medium containing 10% fetal bovine serum (FBS), with penicillin and streptomycin.  
670 HepG2 cells were cultured in Minimum Essential Medium containing 10% FBS, 1mM sodium  
671 pyruvate, 1X MEM Non-Essential Amino Acids solution (ThermoFisher, #11140050) with  
672 penicillin and streptomycin. Cells were incubated in a 37°C incubator in an atmosphere of 5%  
673 CO<sub>2</sub> in air.

674 To prepare RNA-seq libraries, 4x10<sup>5</sup> HEK293 expressing Tet-PEX5C11A-Puro cells  
675 were seeded in a 12 well plate. After 1 day, 1ug/ml of doxycycline was added to the cells to  
676 induce PEX5C11A in the cells. After 72hrs, total RNA was isolated from the cells with or  
677 without doxycycline treatment. 3x10<sup>5</sup> HepG2 cells were seeded in a 6-well plate. Transfection  
678 of siRNA into HepG2 cells was performed with lipofectamine RNAiMAX (ThermoFisher)  
679 according to the manufacturer's instructions. On-TARGET plus human PEX5 siRNA  
680 (Dharmacon # L-015788-00-0005) was used for knockdown of PEX5 in HepG2 cells. For  
681 negative control, On-TARGET plus non-targeting siRNA (Dharmacon # D-001810-02-05) was  
682 used. After 72hrs, total RNA was isolated from the cells. All samples were treated TURBOTM  
683 DNase (Thermofisher #AM1907) to remove all traces of DNA. RNA-seq libraries were  
684 constructed using 1ug DNA-free total RNA with NEBNext Ultra II RNA Library Prep Kit for  
685 Illumina (New England Biolabs, Ipswich, MA, USA. NEB#E7770). Poly (A) mRNA was  
686 isolated using NEBNext Poly(A) mRNA Magnetic isolation module (New England Biolabs,  
687 Ipswich, MA, USA. NEB#E7490). After first strand and second strand and second strand cDNA  
688 synthesis, each cDNA library was ligated with a NEBNext adaptor and barcoded with an

689 adaptor-specific index. Twelve libraries were pooled in equal concentrations and sequenced  
690 using Illumina HiSeq 3000 platform.

### 691 **RNA-Seq data processing and differential expression analysis**

692 FaastQC (v0.11.8) was first performed to check the sequencing read quality. Then  
693 sequence alignment and mapping was performed using the Spliced Transcripts Alignment to a  
694 Reference (STAR) software (v2.7.3a)<sup>107</sup>. The raw reads were mapped to *D. melanogaster*  
695 genome (BDGP Release 6) or Genome Reference Consortium Human Build 38 (GRCh38).  
696 Reads mapped were then counted with summarizedOverlaps function using “Union” mode in R.  
697 Counts are then analyzed in DESeq2 (v1.26.0)<sup>108</sup> for batch control analysis and test for  
698 differential expression.

### 699 **Principal component analysis (PCA), heatmap and expression correlation plot**

700 PCA graph was generated using plotPCA function of R package DESeq2<sup>108</sup>. Heatmaps  
701 and hierarchy clustering analysis were generated using heatmap.2 function of R package gplots.  
702 The density plots were plotted using R package ggplot.

### 703 **Gene set enrichment analysis (GSEA)**

704 For GSEA analysis, all pre-defined set of 132 KEGG pathways in Drosophila were  
705 downloaded from KEGG. Text was trimmed and organized using Java script. Normalized counts  
706 were used as input for parametric analysis and organized as suggested by GSEA tutorial site  
707 (GSEA<sup>109,110</sup>). Collapse dataset to gene symbols was set to false. Permutation type was set to  
708 gene set; number of permutations was set to 1000; enrichment statistic used as weighted analysis;  
709 metric for ranking genes was set to Signal to Noise.

### 710 **Gene ontology and pathway analysis**

711 Functional annotation analysis of differentially expressed genes was performed using  
712 STRING<sup>111</sup> or DAVID<sup>112</sup>. GO terms (Biological Process, Molecular Function, Cellular  
713 Component), KEGG pathway, INTERPRO Protein Domains and Features, were retrieved from  
714 the analysis.

#### 715 **Quantitative real-time polymerase chain reaction (qRT-PCR)**

716 qRT-PCR was performed using Quantstudio 3 Real-Time PCR system and SYBR green  
717 master mixture (Thermo Fisher Scientific, USA Catalog number: A25778). All gene expression  
718 levels were normalized to Rpl32 (in *Drosophila*), GAPDH (in humans) by the method of  
719 comparative Ct<sup>113</sup>. Mean and standard errors for each gene were obtained from the averages of  
720 three biological replicates, with two technical repeats.

#### 721 **Western Blotting**

722 5x10<sup>5</sup> HEK293-PEX5C11A cells were seeded in 6-well plates. After one day, cells were  
723 treated with or without doxycycline for 3 days. The proteins were extracted in NP-40 cell lysis  
724 buffer (Thermo Fisher Scientific, #FNN0021) with Halt<sup>TM</sup> phosphatase inhibitor Cocktail  
725 (Thermo Fisher Scientific, #78420). Protein samples were denatured with Laemmli sample  
726 buffer (Bio-Rad, Cat# 161-0737) at 95°C for 5 min. Then proteins were separated by Mini-  
727 PROTEAN® TGX Precast Gels (Bio-Rad). Following incubation with primary and secondary  
728 antibodies, the blots were visualized with Pierce ECL Western Blotting Substrate (Thermo  
729 Scientific). The following antibodies were used: anti-phospho eIF2 $\alpha$  (Cell Signaling Technology,  
730 #9721, 1:2000), anti-eIF2 $\alpha$  (Cell Signaling Technology, #5324, 1:3000).

731

732

733



734 **Immunostaining**

735 Anti-RpS6 (Cell Signaling, catalog number 2317) at concentration of 1:100 was used to  
736 stain oenocytes' RpS6<sup>114</sup>. Anti-RpS6 at concentration of 1:50 was used to stain human cells.  
737 Anti-phospho-eIF2 $\alpha$  (Ser 51, Cell Signaling, catalog number 9721) at concentration of 1:100 was  
738 used. Secondary antibodies were obtained from Jackson ImmunoResearch.

739 Adult oenocyte tissues were dissected in PBS and fixed in 4% paraformaldehyde for  
740 15 min at room temperature. Tissues were washed with 1x PBS with 0.3% Triton X-100  
741 (PBST) for three times (~5 min each time), and blocked in PBST with 5% normal goat serum  
742 for 30 min. Tissues were then incubated overnight at 4°C with primary antibodies diluted in  
743 PBST, followed by the incubation with secondary antibodies for 1 h at room temperature. After  
744 washes, tissues were mounted using ProLong Gold antifade reagent (Thermo Fisher Scientific)  
745 and imaged with an FV3000 Confocal Laser Scanning Microscope (Olympus). DAPI or Hoechst  
746 33342 was used for nuclear staining.

747  $1.2 \times 10^5$  HEK293-PEX5C11A cells were seeded in 24-well plates on coverslips  
748 (Neuvitro #GG1215PLL). After 1 day, cells were treated with or without doxycycline (1  $\mu$ g/ml)  
749 for 3 days. The cells were rinsed with PBS, fixed in 4% paraformaldehyde for 10 min, and rinsed  
750 with PBS again. Cells were permeabilized in 0.5% Triton X-100 in PBS for 10 min. Cells were  
751 treated with PBS containing 1% bovine serum albumin (BSA) for 1 hr at room temperature. The  
752 cells were incubated with antibody against RPS6 (1:50) diluted in PBS for overnight at 4°C.  
753 Next day, cells were washed with 0.05% Triton X-100 in PBS for three times and incubated with  
754 Alexa Flour® 488 donkey anti-mouse IgG (1:500) and Hoechst (1:1000) diluted in PBS for 1 hr  
755 at room temperature in the dark. After that, cells were washed with 0.05% Triton X-100 in PBS

756 for three times. Cells were briefly washed with PBS and mounted on glass slides using mounting  
757 medium (Thermo Fisher Scientific, #P36961). Images were visualized by confocal microscope.

### 758 **Image analysis and quantification**

759 Confocal images were quantified using Olympus CellSense Dimension software  
760 (Olympus, v 1.16) and ImageJ (v1.49). For oenocyte RpS6 signaling quantification, five  
761 oenocyte nucleus were randomly selected from each image. Each single nucleus was set as a  
762 region of interest (ROI). A background ROI was also selected. The intensity of RpS6 signal was  
763 calculated for nucleus intensity and normalized to total intensity (total intensity = nucleus  
764 intensity + background). For human RpS6 quantification, we counted the number of cells that  
765 that contain RpS6 signal inside the nucleus versus total number of cells in one image.

### 766 **Statistical analysis**

767 GraphPad Prism (GraphPad Software, La Jolla, CA, USA, v6.07) or Deseq2 was used for  
768 statistical analysis. To compare the mean value of treatment groups versus that of control,  
769 student t-test was used. Log2 fold change and FDR values were calculated by Deseq2 using  
770 Benjamini-Hochberg method for sequencing data.

771

### 772 **Figure legends**

773 **Figure 1 Transcriptomic analysis for peroxisomal stress response in *Drosophila* oenocytes**  
774 **and human cells. A** Schematic diagram showing the key genes involved in peroxisomal import,  
775 as well as oenocyte specific RNA-seq analysis. RNAi targets genes marked in red. **B** Schematic  
776 diagram for generation of CRISPR Knock-in HEK293 cells expressing PEX5<sup>C11A</sup>. **C** Western  
777 blot shows inducible PEX5<sup>C11A</sup> construct after treatment of Doxycycline. **D** Immunostaining  
778 showing GPF-PTS1 importing activity in wild type cells (Dox-) and PEX5<sup>C11A</sup> expressing cells

779 (Dox+). Scale bar represents 10 $\mu$ m. **E** Quantification of **D** on % cells with PTS1 import activity  
780 in Dox- versus Dox+ cells. **F** Quantification in **D** showing the number of PEX14 positive  
781 peroxisomes in Dox- versus Dox+ cells. **G – H** Schematic diagram showing RNA-seq analysis  
782 using human cells.

783

784 **Figure 2 Pex1, Pex12 knock-down show distinct transcriptional pattern from Pex5. A**  
785 Hierarchical clustering heatmap analysis, plotting log<sub>2</sub> fold change (+RU / -RU) in yw, Pex1  
786 RNAi, Pex12 RNAi, Pex5 RNAi oenocyte samples. **B** Number of differentially expressed genes  
787 (DEGs) across all oenocyte samples. **C** Venn diagram analysis showing genes commonly up  
788 regulated by yw, Pex1 RNAi, Pex12 RNAi and Pex5 RNAi (marked by red). **D** Gene Ontology  
789 (GO) term analysis on commonly induced genes from **C**. **E** Organelle localization of proteins  
790 produced commonly induced genes. **F** Venn diagram analysis showing genes commonly down  
791 regulated by yw, Pex1 RNAi, Pex12 RNAi, and Pex5 RNAi (marked by red). **G** Gene Ontology  
792 (GO) term analysis on commonly induced genes from **F**.

793

794 **Table 1 GSEA pathway analysis under Pex5, Pex12 and Pex1 RNAi.** NES: normalized  
795 enrichment score. “Up or down regulated” indicates whether genes within that pathway are  
796 induced or reduced under RNAi treatment.

797

798 **Figure 3 Peroxisomal stress induced endoplasmic reticulum genes and the integrated stress**  
799 **response (ISR).** **A-C** Density plot showing the expression fold change (Pex<sup>RNAi</sup> / Control) of ER  
800 pathway genes in oenocytes, in respective Pex<sup>RNAi</sup>. **D** Density plot of fold change in selected  
801 genes involved in ERAD pathway across Pex1, Pex12, and Pex5 RNAi samples. **E**

802 Immunostaining of oenocytes with anti-P-eIF2 $\alpha$  in control flies (- RU feeding) versus oenocyte-  
803 specific *Pex5* RNAi flies (200 $\mu$ M RU). **F** Quantification of P-eIF2 $\alpha$  intensity from **E**. N = 6  
804 female flies. **G** Western blot measures P-eIF2 $\alpha$  and eIF2 $\alpha$  level in PEX5<sup>C11A</sup> cell line treated  
805 with increasing concentration of Doxycycline (0 ug/ml, 1 ug/ml, and 5 ug/ml). **H** Quantification  
806 of band intensity ratio (p-eIF2 $\alpha$ /eIF2 $\alpha$ ) in **J**. N = 2-3.

807

808 **Figure 4: Peroxisome dysfunction up-regulates inflammation and cholesterol pathways in**  
809 **human cells.** **A** Venn diagram analysis showing commonly up-regulated genes by PEX5<sup>C11A</sup>  
810 induction and PEX5 RNAi. **B-C** Gene ontology analysis on up-regulated genes only in PEX5<sup>C11A</sup>  
811 or only in PEX5 RNAi cells. **D** Venn diagram analysis showing commonly down-regulated genes  
812 by PEX5<sup>C11A</sup> induction and PEX5 RNAi. **E-F** Gene ontology analysis on down-regulated genes  
813 only in PEX5<sup>C11A</sup> or only in PEX5 RNAi cells. **G** List of enriched pathways from GSEA analysis  
814 on PEX5 RNAi cells. \* represents P-value. **H-K** GSEA enrichment profiles on PEX5<sup>C11A</sup>:  
815 Oxidative phosphorylation, MAPK signaling, regulation of lipolysis in adipocytes, HIPPO  
816 signaling. **L-M** GSEA enrichment profiles on PEX5 RNAi: spliceosome, cholesterol metabolism.  
817 **N** Selected genes from cholesterol metabolism pathways on PEX5 RNAi cells. Y-axis represents  
818 fold change (RNAi / Control).

819

820 **Figure 5 Peroxisome dysfunction represses ribosomal genes in both flies and humans: A**  
821 Density plot showing the fold change (Treatment / Control) of ribosome biogenesis pathway  
822 genes in oenocytes and PEX5 RNAi in human cells. **B** Density plot showing the fold change  
823 (Treatment / Control) of ribosome pathway genes in oenocytes and PEX5<sup>C11A</sup> in human cells. **C**  
824 Schematic diagram showing ribosome biogenesis pathway, the role of biogenesis factors and

825 their fold change in oenocytes (Pex5, Pex12 RNAi) and human cells (PEX5 RNAi). Genes  
826 reduced the expression under treatment for more than 0.7-fold are noted on the diagram (red  
827 arrow indicates genes reduced under Pex5 RNAi in oenocytes, yellow indicates Pex12 RNAi,  
828 blue indicates PEX5 KD in human cells).

829

830 **Figure 6 Impaired ribosome biogenesis genes in human and flies: A-B** Overview of *D.*

831 *melanogaster*, and Mammalian rRNA biogenesis Pathways. rRNA biogenesis intermediates are  
832 generally conserved among vertebrates; 5.8S rRNA is cleaved into 2S and a short 5.8S, and 28S  
833 rRNAs are cleaved into 28Sa and 28Sb. Blue arrows indicate the locations of the primers for  
834 ETS. Green label indicates primer locations for ITS1. Red arrow indicates primers for 18S. **C-F**

835 The relative amounts of the ETS, ITS1, unprocessed ETS/18S ratio, 18S were measured by  
836 qPCR using RNA isolated from control oenocytes or Pex5 RNAi oenocytes. Data are presented  
837 as the mean  $\pm$  s.e.m (n = 2). **G-H** The relative amounts of the unprocessed ETS/18S ratio, 18S  
838 were measured by qPCR using RNA isolated from control cells (-DOX) or PEX5<sup>C11A</sup> (+DOX)  
839 cells. Data are presented as the mean  $\pm$  s.e.m (n = 3). **I-L** Analysis of ribosome proteins (RPs)

840 nucleolar localization. **I** Depletion of Pex5 in oenocytes results in the accumulation of RpS6  
841 nucleolus. Scale bar shows 3.3 $\mu$ m. **J** Quantification of RpS6 intensity in nucleolus normalized to  
842 total intensity within the cell. **K** Expressing PEX<sup>C11A</sup> (+Dox) results in the accumulation of RpS6  
843 nucleolus in HEK293 cells (n=6). Scale bar shows 20 $\mu$ m. **L** Quantification of number of cells  
844 containing RpS6 signal in nucleolus normalized to total number of cells, in control (-Dox) and  
845 PEX5<sup>C11A</sup> expressing cells (+Dox) (n = 6).

846

847 **Supplementary figure 1:** A PCA analysis on gene expression from oenocyte samples: Pex1,  
848 Pex12, Pex5 and yw. 0RU represents the control group, 200RU represents the RNAi group. **B**  
849 PCA analysis on gene expression from human cell culture samples: PEX5<sup>C11A</sup> (-DOX) versus  
850 PEX5<sup>C11A</sup> (+DOX); control versus PEX5<sup>RNAi</sup>. **C-D** GO analysis for clusters identified in Figure  
851 **2A. E** Oenocyte genes that are commonly repressed by all Pex knockdowns but not affected by  
852 RU feeding. **F** Genes that are commonly induced by PEX5 RNAi and PEX5<sup>C11A</sup> in human cell  
853 cultures.

854  
855 **Supplementary figure 2:** A GSEA enrichment profiles on ribosome biogenesis pathway in Pex5  
856 RNAi, Pex12 RNAi of oenocyte samples and PEX5 knockdown in human cell culture. **B**  
857 Heatmap analysis on plotting log<sub>2</sub> (fold change) value in control group (200 RU/0RU) and Pex5  
858 RNAi samples in oenocytes on ribosome genes. **C** GSEA enrichment profiles in ribosome  
859 pathway in Pex5 RNAi in oenocyte samples, PEX5 knockdown and PEX5<sup>C11A</sup> samples in human  
860 cells. **D-E** Density plot on fold change of all genes in PEX5<sup>C11A</sup> group and PEX5 knockdown  
861 group. **F** Density plot on fold change of ER pathway genes in PEX5<sup>C11A</sup> group and PEX5  
862 knockdown group. **G-I** GSEA enrichment profiles on protein processing in endoplasmic  
863 reticulum in Pex5 RNAi, Pex12 RNAi and Pex1 RNAi samples in oenocytes. **J** Western blot  
864 measuring P-eIF2 $\alpha$  and eIF2 $\alpha$  level in control cell line treated with increasing concentration of  
865 Doxycycline (0 ug/ml, 1 ug/ml, and 5 ug/ml). N = 2. **K** Immunostaining of oenocytes expressing  
866 xbp1-EGFP reporter with anti-GFP. EGFP is out of frame without Ire-1-mediated splicing but  
867 comes in frame after splicing. Xbp1-EGFP marker is activated by Ire-1 in response to DTT  
868 treatment (bottom panel). The middle panels show immunostaining of oenocytes with control or  
869 Pex5 knockdown. **L** Quantification on nucleus GFP intensity in **K. M** PEX5<sup>C11A</sup> cells were  
870 treated with Doxycycline (5 ug/ml) or without, and cell lysates were obtained. RNA extracted

871 was subjected to RT-PCR with *XBPI* primers. The lengths of DNA size markers are shown on  
872 the left.

873

874

875

876

877

878

879

880

881

882

883

884

885

886

887

888

889

890

891

892

## References

- 893 1. Pridie, C., Ueda, K. & Simmonds, A.J. Rosy Beginnings: Studying Peroxisomes in  
894 *Drosophila*. *Frontiers in Cell and Developmental Biology* **8** (2020).
- 895 2. Fujiki, Y. *et al.* Recent insights into peroxisome biogenesis and associated diseases. *J Cell*  
896 *Sci* **133** (2020).
- 897 3. Violante, S. *et al.* Peroxisomes can oxidize medium- and long-chain fatty acids through a  
898 pathway involving ABCD3 and HSD17B4. *FASEB J* **33**, 4355-4364 (2019).
- 899 4. Shai, N., Schuldiner, M. & Zalckvar, E. No peroxisome is an island - Peroxisome contact  
900 sites. *Biochim Biophys Acta* **1863**, 1061-1069 (2016).
- 901 5. Fujiki, Y., Okumoto, K., Mukai, S., Honsho, M. & Tamura, S. Peroxisome biogenesis in  
902 mammalian cells. *Front Physiol* **5**, 307 (2014).
- 903 6. Steinberg, S.J. *et al.* Peroxisome biogenesis disorders. *Biochim Biophys Acta* **1763**, 1733-  
904 1748 (2006).
- 905 7. Subramani, S. Components involved in peroxisome import, biogenesis, proliferation,  
906 turnover, and movement. *Physiol Rev* **78**, 171-188 (1998).
- 907 8. Waterham, H.R. & Cregg, J.M. Peroxisome biogenesis. *Bioessays* **19**, 57-66 (1997).
- 908 9. Smith, M.D. & Schnell, D.J. Peroxisomal protein import. the paradigm shifts. *Cell* **105**,  
909 293-296 (2001).
- 910 10. Smith, J.J. & Aitchison, J.D. Peroxisomes take shape. *Nat Rev Mol Cell Biol* **14**, 803-817  
911 (2013).
- 912 11. Wanders, R.J. Metabolic and molecular basis of peroxisomal disorders: a review. *Am J*  
913 *Med Genet A* **126A**, 355-375 (2004).
- 914 12. Wanders, R.J. & Waterham, H.R. Peroxisomal disorders I: biochemistry and genetics of  
915 peroxisome biogenesis disorders. *Clin Genet* **67**, 107-133 (2005).
- 916 13. Baumgartner, M.R. & Saudubray, J.M. Peroxisomal disorders. *Semin Neonatol* **7**, 85-94  
917 (2002).
- 918 14. Gould, S.J. & Valle, D. Peroxisome biogenesis disorders: genetics and cell biology. *Trends*  
919 *Genet* **16**, 340-345 (2000).
- 920 15. Narayan, V. *et al.* Deep Proteome Analysis Identifies Age-Related Processes in *C.*  
921 *elegans*. *Cell Syst* **3**, 144-159 (2016).
- 922 16. Weir, H.J. *et al.* Dietary Restriction and AMPK Increase Lifespan via Mitochondrial  
923 Network and Peroxisome Remodeling. *Cell Metab* **26**, 884-896 e885 (2017).
- 924 17. Legakis, J.E. *et al.* Peroxisome senescence in human fibroblasts. *Mol Biol Cell* **13**, 4243-  
925 4255 (2002).
- 926 18. Huang, K. *et al.* RiboTag translomic profiling of *Drosophila* oenocytes under aging and  
927 induced oxidative stress. *BMC Genomics* **20**, 50 (2019).
- 928 19. Huang, K. *et al.* Impaired peroxisomal import in *Drosophila* oenocytes causes cardiac  
929 dysfunction by inducing upd3 as a peroxikine. *Nat Commun* **11**, 2943 (2020).
- 930 20. Lefevre, S.D., van Roermund, C.W., Wanders, R.J., Veenhuis, M. & van der Klei, I.J. The  
931 significance of peroxisome function in chronological aging of *Saccharomyces cerevisiae*.  
932 *Aging Cell* **12**, 784-793 (2013).
- 933 21. Zhou, B. *et al.* Midlife gene expressions identify modulators of aging through dietary  
934 interventions. *Proc Natl Acad Sci U S A* **109**, E1201-1209 (2012).



- 935 22. Curran, S.P. & Ruvkun, G. Lifespan regulation by evolutionarily conserved genes  
936 essential for viability. *PLoS Genet* **3**, e56 (2007).
- 937 23. Turi, Z., Lacey, M., Mistrik, M. & Moudry, P. Impaired ribosome biogenesis: mechanisms  
938 and relevance to cancer and aging. *Aging (Albany NY)* **11**, 2512-2540 (2019).
- 939 24. Russell, J. & Zomerdijk, J.C. RNA-polymerase-I-directed rDNA transcription, life and  
940 works. *Trends Biochem Sci* **30**, 87-96 (2005).
- 941 25. Ruggero, D. & Pandolfi, P.P. Does the ribosome translate cancer? *Nat Rev Cancer* **3**, 179-  
942 192 (2003).
- 943 26. Kornprobst, M. *et al.* Architecture of the 90S Pre-ribosome: A Structural View on the  
944 Birth of the Eukaryotic Ribosome. *Cell* **166**, 380-393 (2016).
- 945 27. Woolford, J.L., Jr. & Baserga, S.J. Ribosome biogenesis in the yeast *Saccharomyces*  
946 *cerevisiae*. *Genetics* **195**, 643-681 (2013).
- 947 28. Zhang, J. *et al.* Assembly factors Rpf2 and Rrs1 recruit 5S rRNA and ribosomal proteins  
948 rpL5 and rpL11 into nascent ribosomes. *Genes Dev* **21**, 2580-2592 (2007).
- 949 29. Dragon, F. *et al.* A large nucleolar U3 ribonucleoprotein required for 18S ribosomal RNA  
950 biogenesis. *Nature* **417**, 967-970 (2002).
- 951 30. Grandi, P. *et al.* 90S pre-ribosomes include the 35S pre-rRNA, the U3 snoRNP, and 40S  
952 subunit processing factors but predominantly lack 60S synthesis factors. *Mol Cell* **10**,  
953 105-115 (2002).
- 954 31. Mayer, C. & Grummt, I. Ribosome biogenesis and cell growth: mTOR coordinates  
955 transcription by all three classes of nuclear RNA polymerases. *Oncogene* **25**, 6384-6391  
956 (2006).
- 957 32. van Riggelen, J., Yetil, A. & Felsher, D.W. MYC as a regulator of ribosome biogenesis and  
958 protein synthesis. *Nat Rev Cancer* **10**, 301-309 (2010).
- 959 33. Gutierrez, E., Wiggins, D., Fielding, B. & Gould, A.P. Specialized hepatocyte-like cells  
960 regulate *Drosophila* lipid metabolism. *Nature* **445**, 275-280 (2007).
- 961 34. Schliebs, W., Girzalsky, W. & Erdmann, R. Peroxisomal protein import and ERAD:  
962 variations on a common theme. *Nat Rev Mol Cell Biol* **11**, 885-890 (2010).
- 963 35. Mast, F.D. *et al.* A *Drosophila* model for the Zellweger spectrum of peroxisome  
964 biogenesis disorders. *Dis Model Mech* **4**, 659-672 (2011).
- 965 36. Okumoto, K. *et al.* Cysteine ubiquitination of PTS1 receptor Pex5p regulates Pex5p  
966 recycling. *Traffic* **12**, 1067-1083 (2011).
- 967 37. Landis, G.N. *et al.* The progesterone antagonist mifepristone/RU486 blocks the negative  
968 effect on life span caused by mating in female *Drosophila*. *Aging (Albany NY)* **7**, 53-69  
969 (2015).
- 970 38. Chen, C.L. *et al.* Proteomic mapping in live *Drosophila* tissues using an engineered  
971 ascorbate peroxidase. *Proc Natl Acad Sci U S A* **112**, 12093-12098 (2015).
- 972 39. Faust, J.E., Verma, A., Peng, C. & McNew, J.A. An inventory of peroxisomal proteins and  
973 pathways in *Drosophila melanogaster*. *Traffic* **13**, 1378-1392 (2012).
- 974 40. Park, S., Choi, S.G., Yoo, S.M., Son, J.H. & Jung, Y.K. Choline dehydrogenase interacts  
975 with SQSTM1/p62 to recruit LC3 and stimulate mitophagy. *Autophagy* **10**, 1906-1920  
976 (2014).
- 977 41. Cinnamon, E. *et al.* *Drosophila* Spidey/Kar Regulates Oenocyte Growth via PI3-Kinase  
978 Signaling. *PLoS Genet* **12**, e1006154 (2016).

- 979 42. Lee, S.K., Son le, T., Choi, H.J. & Ahnn, J. Dicarbonyl/l-xylulose reductase (DCXR): The  
980 multifunctional pentosuria enzyme. *The international journal of biochemistry & cell*  
981 *biology* **45**, 2563-2567 (2013).
- 982 43. Seal, R.P., Daniels, G.M., Wolfgang, W.J., Forte, M.A. & Amara, S.G. Identification and  
983 characterization of a cDNA encoding a neuronal glutamate transporter from *Drosophila*  
984 *melanogaster*. *Recept Channels* **6**, 51-64 (1998).
- 985 44. Gonzalez, E.A., Garg, A., Tang, J., Nazario-Toole, A.E. & Wu, L.P. A glutamate-dependent  
986 redox system in blood cells is integral for phagocytosis in *Drosophila melanogaster*. *Curr*  
987 *Biol* **23**, 2319-2324 (2013).
- 988 45. Srinivas, U.S., Tan, B.W.Q., Vellayappan, B.A. & Jeyasekharan, A.D. ROS and the DNA  
989 damage response in cancer. *Redox Biol* **25**, 101084 (2019).
- 990 46. Shokolenko, I., Venediktova, N., Bochkareva, A., Wilson, G.L. & Alexeyev, M.F. Oxidative  
991 stress induces degradation of mitochondrial DNA. *Nucleic Acids Res* **37**, 2539-2548  
992 (2009).
- 993 47. Park, E.S., Yoo, Y.J. & Elangovan, M. The opposite role of two UBA-UBX containing  
994 proteins, p47 and SAKS1 in the degradation of a single ERAD substrate, alpha-TCR. *Mol*  
995 *Cell Biochem* **425**, 37-45 (2017).
- 996 48. Harding, H.P., Zhang, Y. & Ron, D. Protein translation and folding are coupled by an  
997 endoplasmic-reticulum-resident kinase. *Nature* **397**, 271-274 (1999).
- 998 49. Ryoo, H.D., Domingos, P.M., Kang, M.J. & Steller, H. Unfolded protein response in a  
999 *Drosophila* model for retinal degeneration. *EMBO J* **26**, 242-252 (2007).
- 1000 50. Yoshida, H., Matsui, T., Yamamoto, A., Okada, T. & Mori, K. XBP1 mRNA Is Induced by  
1001 ATF6 and Spliced by IRE1 in Response to ER Stress to Produce a Highly Active  
1002 Transcription Factor. *Cell* **107**, 881-891 (2001).
- 1003 51. Fernandez-Vizarra, E., Tiranti, V. & Zeviani, M. Assembly of the oxidative  
1004 phosphorylation system in humans: what we have learned by studying its defects.  
1005 *Biochim Biophys Acta* **1793**, 200-211 (2009).
- 1006 52. Peeters, A., Swinnen, J.V., Van Veldhoven, P.P. & Baes, M. Hepatosteatosis in  
1007 peroxisome deficient liver despite increased beta-oxidation capacity and impaired  
1008 lipogenesis. *Biochimie* **93**, 1828-1838 (2011).
- 1009 53. Peeters, A. *et al.* Mitochondria in peroxisome-deficient hepatocytes exhibit impaired  
1010 respiration, depleted DNA, and PGC-1alpha independent proliferation. *Biochim Biophys*  
1011 *Acta* **1853**, 285-298 (2015).
- 1012 54. Shinde, A.B. *et al.* Mitochondrial disruption in peroxisome deficient cells is hepatocyte  
1013 selective but is not mediated by common hepatic peroxisomal metabolites.  
1014 *Mitochondrion* **39**, 51-59 (2018).
- 1015 55. Mittal, M., Siddiqui, M.R., Tran, K., Reddy, S.P. & Malik, A.B. Reactive oxygen species in  
1016 inflammation and tissue injury. *Antioxid Redox Signal* **20**, 1126-1167 (2014).
- 1017 56. Murphy, M.P. How mitochondria produce reactive oxygen species. *Biochem J* **417**, 1-13  
1018 (2009).
- 1019 57. Zhou, W. & Zhao, M. How Hippo Signaling Pathway Modulates Cardiovascular  
1020 Development and Diseases. *J Immunol Res* **2018**, 3696914-3696914 (2018).
- 1021 58. Johnson, R. & Halder, G. The two faces of Hippo: targeting the Hippo pathway for  
1022 regenerative medicine and cancer treatment. *Nat Rev Drug Discov* **13**, 63-79 (2014).

- 1023 59. Lapi, E. *et al.* PML, YAP, and p73 are components of a proapoptotic autoregulatory  
1024 feedback loop.
- 1025 60. Bertini, E., Oka T Fau - Sudol, M., Sudol M Fau - Strano, S., Strano S Fau - Blandino, G. &  
1026 Blandino, G. YAP: at the crossroad between transformation and tumor suppression.
- 1027 61. Strano, S. *et al.* The transcriptional coactivator Yes-associated protein drives p73 gene-  
1028 target specificity in response to DNA Damage.
- 1029 62. Cottini, F., Anderson, K.C. & Tonon, G. Awakening the Hippo co-activator YAP1, a  
1030 mercurial cancer gene, in hematologic cancers.
- 1031 63. Matallanas, D. *et al.* RASSF1A elicits apoptosis through an MST2 pathway directing  
1032 proapoptotic transcription by the p73 tumor suppressor protein. *Molecular cell* **27**, 962-  
1033 975 (2007).
- 1034 64. Cottini, F. *et al.* Rescue of Hippo coactivator YAP1 triggers DNA damage-induced  
1035 apoptosis in hematological cancers. *Nat Med* **20**, 599-606 (2014).
- 1036 65. Xiao, Q. *et al.* Depletion of CABYR-a/b sensitizes lung cancer cells to TRAIL-induced  
1037 apoptosis through YAP/p73-mediated DR5 upregulation. *Oncotarget* **7**, 9513-9524  
1038 (2016).
- 1039 66. Di Cara, F., Bulow, M.H., Simmonds, A.J. & Rachubinski, R.A. Dysfunctional peroxisomes  
1040 compromise gut structure and host defense by increased cell death and Tor-dependent  
1041 autophagy. *Mol Biol Cell* **29**, 2766-2783 (2018).
- 1042 67. Harries, L.W. *et al.* Human aging is characterized by focused changes in gene expression  
1043 and deregulation of alternative splicing. *Aging Cell* **10**, 868-878 (2011).
- 1044 68. Feingold, K.R. & Grunfeld, C. Introduction to Lipids and Lipoproteins, in *Endotext*. (eds.  
1045 K.R. Feingold *et al.*) (South Dartmouth (MA); 2000).
- 1046 69. Lai, C.Q., Parnell, L.D. & Ordovas, J.M. The APOA1/C3/A4/A5 gene cluster, lipid  
1047 metabolism and cardiovascular disease risk. *Curr Opin Lipidol* **16**, 153-166 (2005).
- 1048 70. van Dijk, K.W., Rensen, P.C., Voshol, P.J. & Havekes, L.M. The role and mode of action of  
1049 apolipoproteins CIII and AV: synergistic actors in triglyceride metabolism? *Curr Opin*  
1050 *Lipidol* **15**, 239-246 (2004).
- 1051 71. Grosskopf, I. *et al.* Apolipoprotein A-V deficiency results in marked hypertriglyceridemia  
1052 attributable to decreased lipolysis of triglyceride-rich lipoproteins and removal of their  
1053 remnants. *Arterioscler Thromb Vasc Biol* **25**, 2573-2579 (2005).
- 1054 72. Kohan, A.B. Apolipoprotein C-III: a potent modulator of hypertriglyceridemia and  
1055 cardiovascular disease. *Curr Opin Endocrinol Diabetes Obes* **22**, 119-125 (2015).
- 1056 73. Panse, V.G. & Johnson, A.W. Maturation of eukaryotic ribosomes: acquisition of  
1057 functionality. *Trends Biochem Sci* **35**, 260-266 (2010).
- 1058 74. Saito, K. *et al.* Functional analysis of a novel glioma antigen, EFTUD1. *Neuro Oncol* **16**,  
1059 1618-1629 (2014).
- 1060 75. Chaker-Margot, M., Hunziker, M., Barandun, J., Dill, B.D. & Klinge, S. Stage-specific  
1061 assembly events of the 6-MDa small-subunit processome initiate eukaryotic ribosome  
1062 biogenesis. *Nat Struct Mol Biol* **22**, 920-923 (2015).
- 1063 76. Perez-Fernandez, J., Martin-Marcos, P. & Dosil, M. Elucidation of the assembly events  
1064 required for the recruitment of Utp20, Imp4 and Bms1 onto nascent pre-ribosomes.  
1065 *Nucleic Acids Res* **39**, 8105-8121 (2011).

- 1066 77. Zhang, L., Wu, C., Cai, G., Chen, S. & Ye, K. Stepwise and dynamic assembly of the  
1067 earliest precursors of small ribosomal subunits in yeast. *Genes Dev* **30**, 718-732 (2016).
- 1068 78. Sloan, K.E., Bohnsack, M.T., Schneider, C. & Watkins, N.J. The roles of SSU processome  
1069 components and surveillance factors in the initial processing of human ribosomal RNA.  
1070 *RNA* **20**, 540-550 (2014).
- 1071 79. Hofmann, E.R. *et al.* Identification and characterization of GRIM-1, a cell-death-  
1072 associated gene product. *J Cell Sci* **123**, 2781-2791 (2010).
- 1073 80. Awad, D. *et al.* Inhibiting eukaryotic ribosome biogenesis. *BMC Biol* **17**, 46 (2019).
- 1074 81. Gadai, O. *et al.* A nuclear AAA-type ATPase (Rix7p) is required for biogenesis and nuclear  
1075 export of 60S ribosomal subunits. *EMBO J* **20**, 3695-3704 (2001).
- 1076 82. Ferreira-Cerca, S., Poll, G., Gleizes, P.E., Tschochner, H. & Milkereit, P. Roles of  
1077 eukaryotic ribosomal proteins in maturation and transport of pre-18S rRNA and  
1078 ribosome function. *Mol Cell* **20**, 263-275 (2005).
- 1079 83. Kruger, T., Zentgraf, H. & Scheer, U. Intranucleolar sites of ribosome biogenesis defined  
1080 by the localization of early binding ribosomal proteins. *J Cell Biol* **177**, 573-578 (2007).
- 1081 84. Zhang, D. *et al.* Aggregation of Ribosomal Protein S6 at Nucleolus Is Cell Cycle-Controlled  
1082 and Its Function in Pre-rRNA Processing Is Phosphorylation Dependent. *J Cell Biochem*  
1083 **117**, 1649-1657 (2016).
- 1084 85. Weller, S., Gould, S.J. & Valle, D. Peroxisome biogenesis disorders. *Annu Rev Genomics*  
1085 *Hum Genet* **4**, 165-211 (2003).
- 1086 86. Hasan, S., Platta, H. & Erdmann, R. Import of proteins into the peroxisomal matrix.  
1087 *Frontiers in Physiology* **4** (2013).
- 1088 87. Ogura, T. & Wilkinson, A.J. AAA+ superfamily ATPases: common structure--diverse  
1089 function. *Genes Cells* **6**, 575-597 (2001).
- 1090 88. Deosaran, E. *et al.* NBR1 acts as an autophagy receptor for peroxisomes. *J Cell Sci* **126**,  
1091 939-952 (2013).
- 1092 89. Gonzalez, K.L. *et al.* A pex1 missense mutation improves peroxisome function in a subset  
1093 of Arabidopsis pex6 mutants without restoring PEX5 recycling. *Proc Natl Acad Sci U S A*  
1094 **115**, E3163-E3172 (2018).
- 1095 90. Seo, J.G., Lai, C.Y., Miceli, M.V. & Jazwinski, S.M. A novel role of peroxin PEX6:  
1096 suppression of aging defects in mitochondria. *Aging Cell* **6**, 405-413 (2007).
- 1097 91. Weller, S. *et al.* Alternative splicing suggests extended function of PEX26 in peroxisome  
1098 biogenesis. *Am J Hum Genet* **76**, 987-1007 (2005).
- 1099 92. Chu, B.B. *et al.* Cholesterol transport through lysosome-peroxisome membrane  
1100 contacts. *Cell* **161**, 291-306 (2015).
- 1101 93. Maxfield, F.R. & Wustner, D. Intracellular cholesterol transport. *J Clin Invest* **110**, 891-  
1102 898 (2002).
- 1103 94. Park, H. *et al.* Peroxisome-derived lipids regulate adipose thermogenesis by mediating  
1104 cold-induced mitochondrial fission. *J Clin Invest* **129**, 694-711 (2019).
- 1105 95. Dirks, R. *et al.* Absence of peroxisomes in mouse hepatocytes causes mitochondrial and  
1106 ER abnormalities. *Hepatology* **41**, 868-878 (2005).
- 1107 96. Islinger, M., Voelkl, A., Fahimi, H.D. & Schrader, M. The peroxisome: an update on  
1108 mysteries 2.0. *Histochem Cell Biol* **150**, 443-471 (2018).

- 1109 97. Jakobsson, A., Westerberg, R. & Jakobsson, A. Fatty acid elongases in mammals: their  
1110 regulation and roles in metabolism. *Prog Lipid Res* **45**, 237-249 (2006).
- 1111 98. Novikoff, P.M. & Novikoff, A.B. Peroxisomes in absorptive cells of mammalian small  
1112 intestine. *J Cell Biol* **53**, 532-560 (1972).
- 1113 99. Zaar, K., Volkl, A. & Fahimi, H.D. Association of isolated bovine kidney cortex  
1114 peroxisomes with endoplasmic reticulum. *Biochim Biophys Acta* **897**, 135-142 (1987).
- 1115 100. Grabenbauer, M., Satzler, K., Baumgart, E. & Fahimi, H.D. Three-dimensional  
1116 ultrastructural analysis of peroxisomes in HepG2 cells. Absence of peroxisomal  
1117 reticulum but evidence of close spatial association with the endoplasmic reticulum. *Cell*  
1118 *Biochem Biophys* **32 Spring**, 37-49 (2000).
- 1119 101. Fahimi, H.D., Baumgart, E. & Volkl, A. Ultrastructural aspects of the biogenesis of  
1120 peroxisomes in rat liver. *Biochimie* **75**, 201-208 (1993).
- 1121 102. Kovacs, W.J. *et al.* Peroxisome deficiency causes a complex phenotype because of  
1122 hepatic SREBP/Insig dysregulation associated with endoplasmic reticulum stress. *J Biol*  
1123 *Chem* **284**, 7232-7245 (2009).
- 1124 103. Faust, P.L. & Kovacs, W.J. Cholesterol biosynthesis and ER stress in peroxisome  
1125 deficiency. *Biochimie* **98**, 75-85 (2014).
- 1126 104. Raman, N., Weir, E. & Muller, S. The AAA ATPase MDN1 Acts as a SUMO-Targeted  
1127 Regulator in Mammalian Pre-ribosome Remodeling. *Mol Cell* **64**, 607-615 (2016).
- 1128 105. Kallstrom, G., Hedges, J. & Johnson, A. The putative GTPases Nog1p and Lsg1p are  
1129 required for 60S ribosomal subunit biogenesis and are localized to the nucleus and  
1130 cytoplasm, respectively. *Mol Cell Biol* **23**, 4344-4355 (2003).
- 1131 106. Saveanu, C. *et al.* Sequential protein association with nascent 60S ribosomal particles.  
1132 *Mol Cell Biol* **23**, 4449-4460 (2003).
- 1133 107. Dobin, A. *et al.* STAR: ultrafast universal RNA-seq aligner. *Bioinformatics* **29**, 15-21  
1134 (2013).
- 1135 108. Love, M.I., Huber, W. & Anders, S. Moderated estimation of fold change and dispersion  
1136 for RNA-seq data with DESeq2. *Genome Biol* **15**, 550 (2014).
- 1137 109. Subramanian, A. *et al.* Gene set enrichment analysis: a knowledge-based approach for  
1138 interpreting genome-wide expression profiles. *Proc Natl Acad Sci U S A* **102**, 15545-  
1139 15550 (2005).
- 1140 110. Mootha, V.K. *et al.* PGC-1alpha-responsive genes involved in oxidative phosphorylation  
1141 are coordinately downregulated in human diabetes. *Nat Genet* **34**, 267-273 (2003).
- 1142 111. Szklarczyk, D. *et al.* STRING v11: protein-protein association networks with increased  
1143 coverage, supporting functional discovery in genome-wide experimental datasets.  
1144 *Nucleic Acids Res* **47**, D607-D613 (2019).
- 1145 112. Huang da, W., Sherman, B.T. & Lempicki, R.A. Bioinformatics enrichment tools: paths  
1146 toward the comprehensive functional analysis of large gene lists. *Nucleic Acids Res* **37**, 1-  
1147 13 (2009).
- 1148 113. Schmittgen, T.D. & Livak, K.J. Analyzing real-time PCR data by the comparative C(T)  
1149 method. *Nat Protoc* **3**, 1101-1108 (2008).
- 1150 114. Martins, T. *et al.* TGFbeta/Activin signalling is required for ribosome biogenesis and cell  
1151 growth in *Drosophila* salivary glands. *Open Biol* **7** (2017).
- 1152

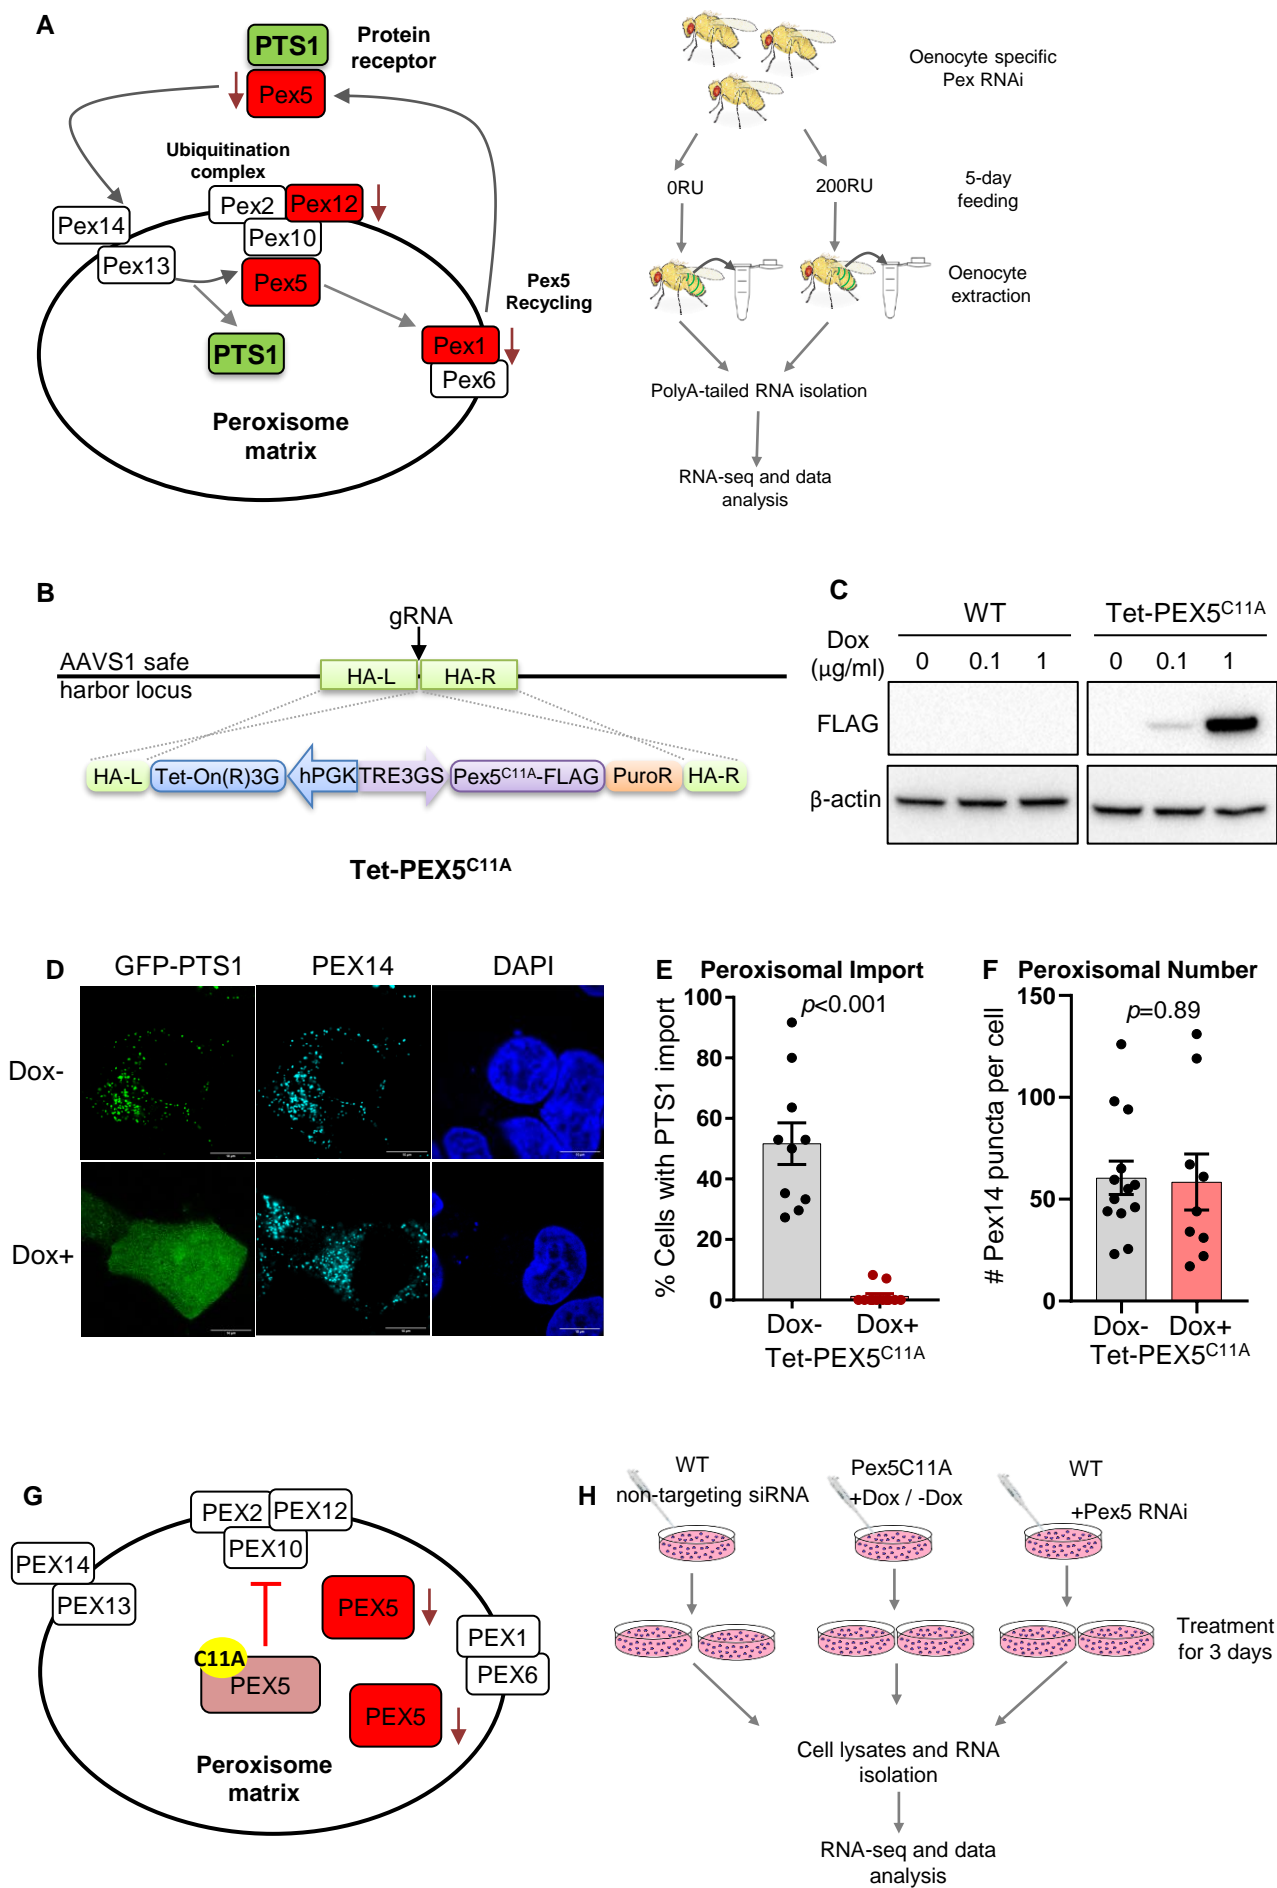

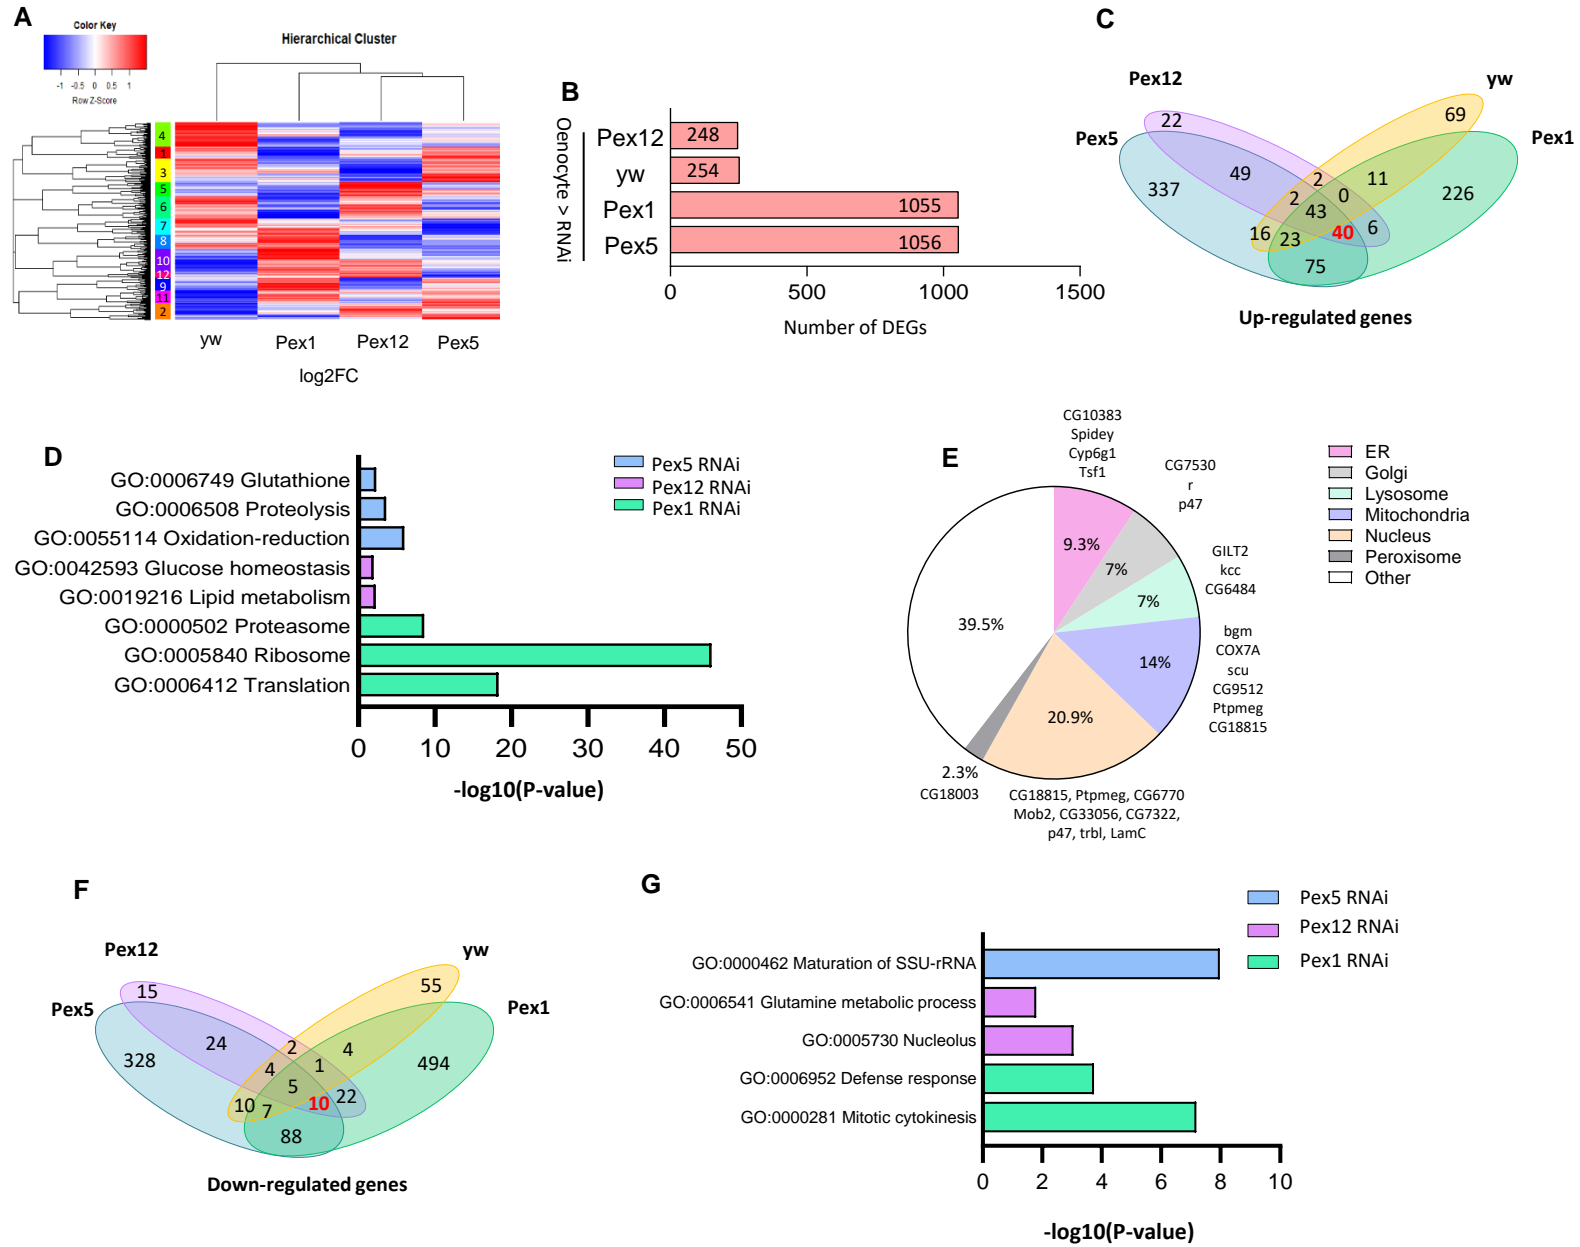

| NAME                                        | NES   | FDR     | Type of RNAi | Up or down regulated |
|---------------------------------------------|-------|---------|--------------|----------------------|
| Ribosome biogenesis in eukaryotes           | 2.44  | <0.0001 | Pex5         | Down                 |
| Ribosome                                    | 1.79  | 0.021   | Pex5         | Down                 |
| DNA replication                             | 1.68  | 0.06    | Pex5         | Down                 |
| Protein processing in endoplasmic reticulum | -1.77 | 0.05    | Pex5         | Up                   |
| Ribosome biogenesis in eukaryotes           | 2.89  | <0.0001 | Pex12        | Down                 |
| DNA replication                             | 2.11  | <0.0001 | Pex12        | Down                 |
| RNA polymerase                              | 1.91  | 0.001   | Pex12        | Down                 |
| RNA transport                               | 1.85  | 0.002   | Pex12        | Down                 |
| Spliceosome                                 | 1.78  | 0.005   | Pex12        | Down                 |
| RNA degradation                             | 1.67  | 0.002   | Pex12        | Down                 |
| Proteasome                                  | -1.90 | 0.01    | Pex12        | Up                   |
| Protein processing in endoplasmic reticulum | -1.46 | 0.188   | Pex12        | Up                   |
| TOLL and IMD signaling pathway              | 1.74  | 0.041   | Pex1         | Down                 |
| DNA replication                             | 1.70  | 0.034   | Pex1         | Down                 |
| Ribosome                                    | -2.41 | <0.0001 | Pex1         | Up                   |
| Proteasome                                  | -1.84 | 0.012   | Pex1         | Up                   |
| Protein processing in endoplasmic reticulum | -1.54 | 0.190   | Pex1         | Up                   |
| Citrate cycle (TCA-cycle)                   | -1.43 | 0.295   | Pex1         | Up                   |

**Table 1**



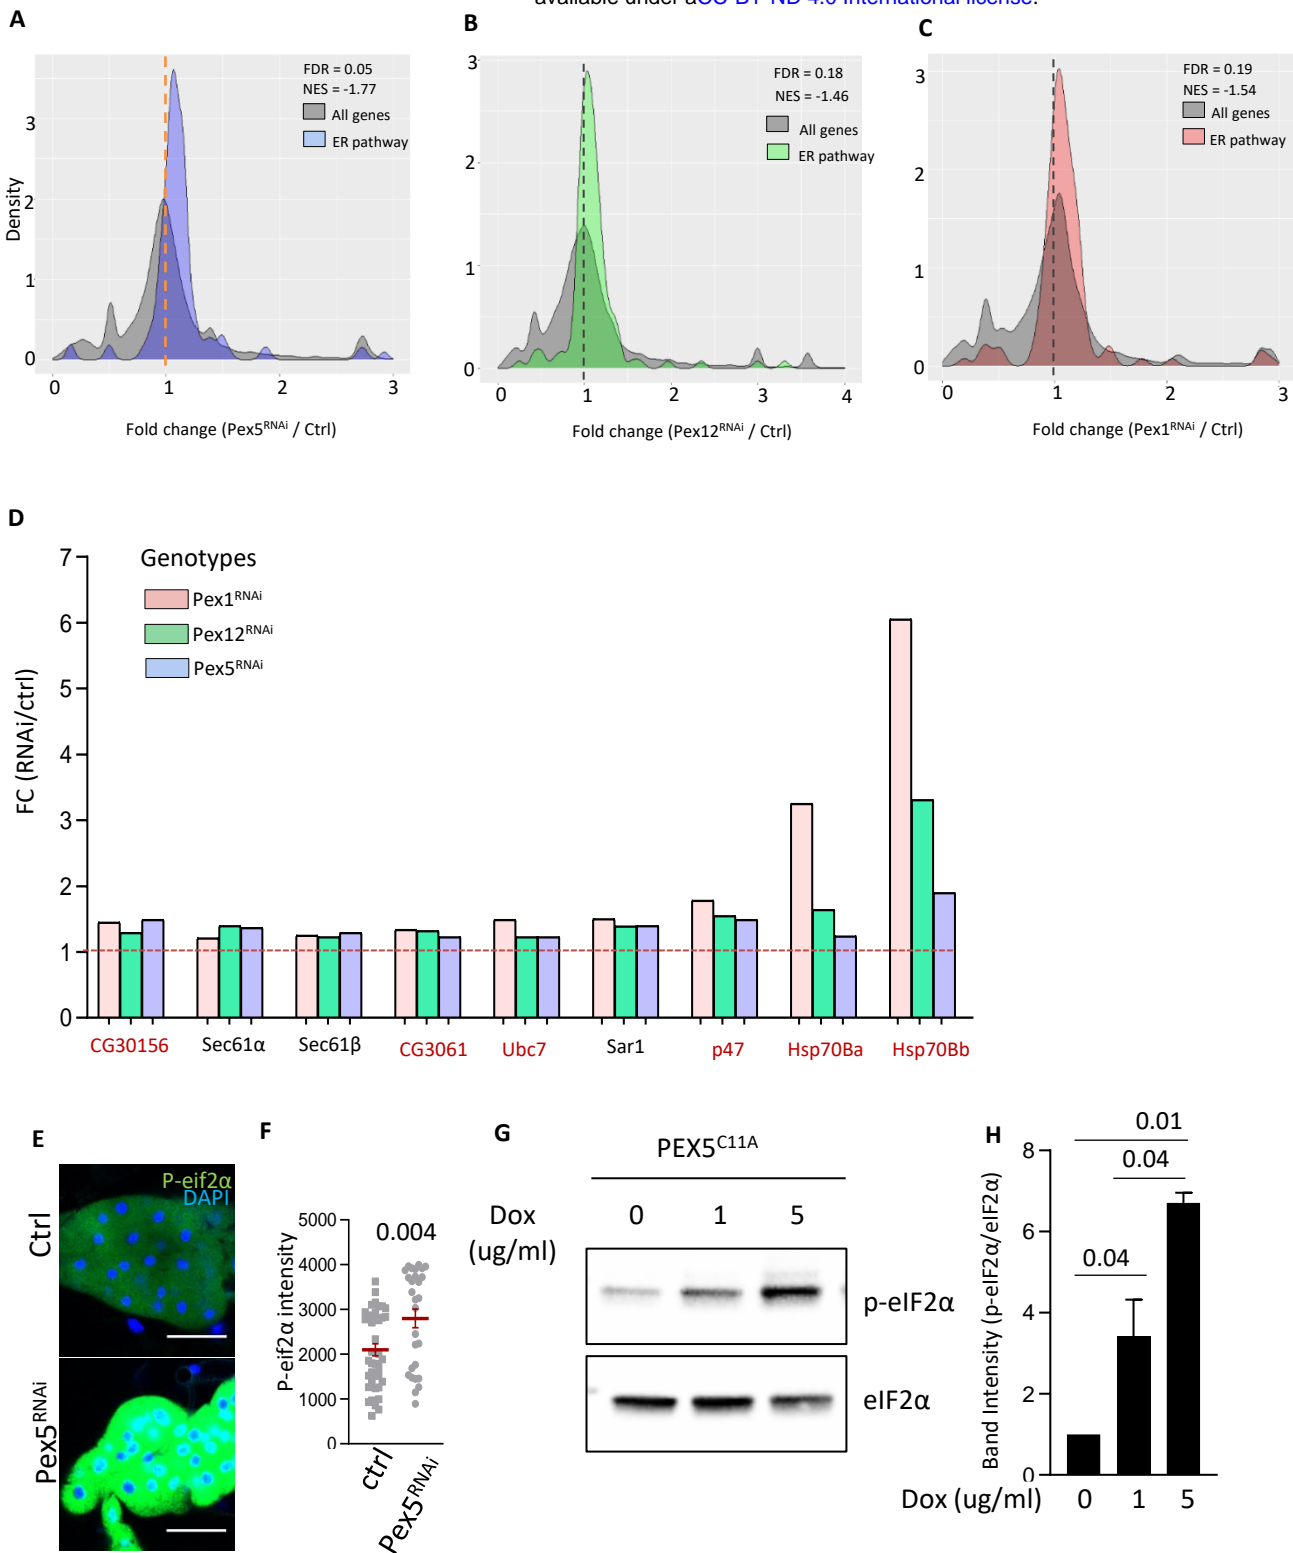

**A**

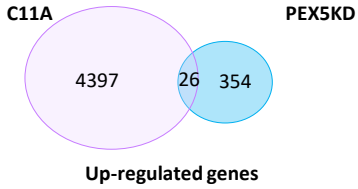

**B**

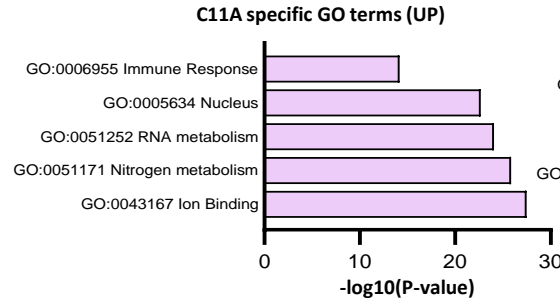

**PEX5KD specific GO terms (UP)**

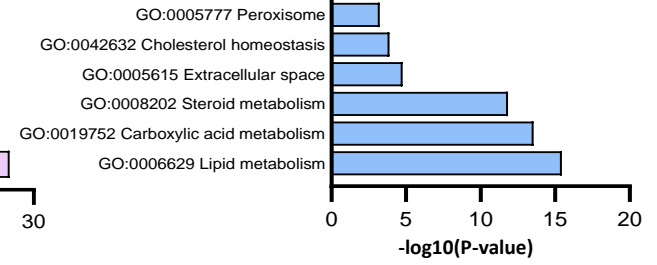

**D**

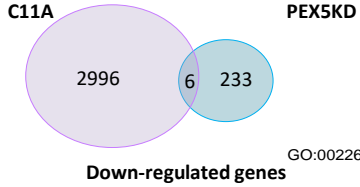

**E**

**C11A specific GO terms (Down)**

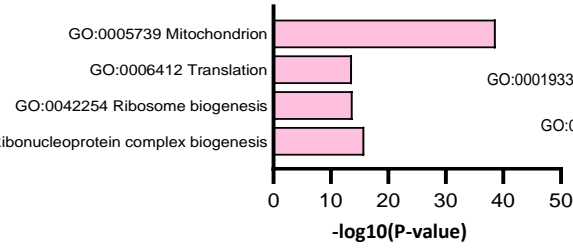

**F**

**PEX5KD specific GO terms (Down)**

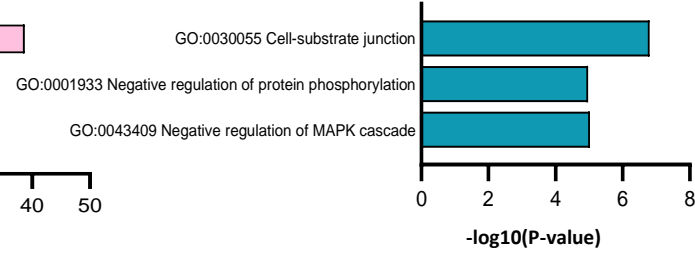

**G**

| NAME                   | NES   | FDR    | RNAi | Regulation |
|------------------------|-------|--------|------|------------|
| Spliceosome            | 1.85  | 0.003  | PEX5 | Down       |
| Cholesterol Metabolism | -1.45 | 0.019* | PEX5 | UP         |

**H**

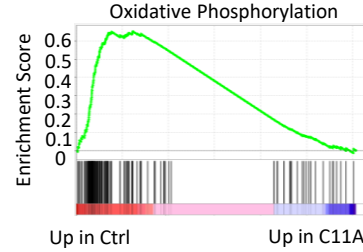

**I**

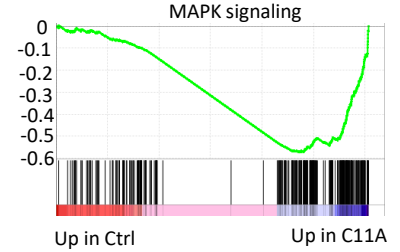

**N**

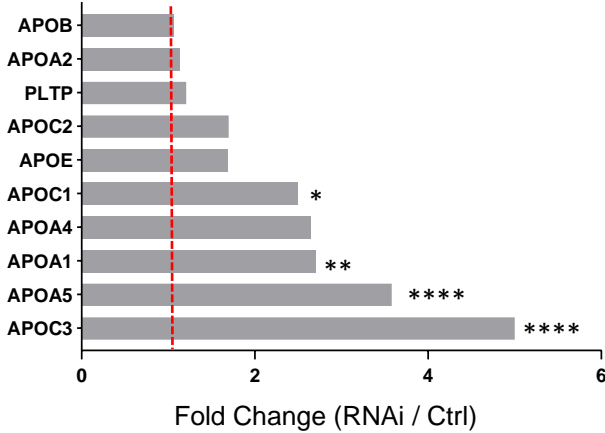

**J**

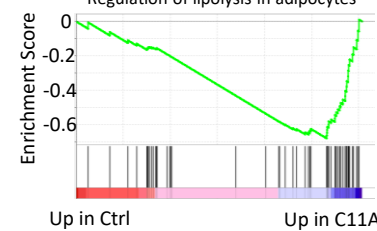

**K**

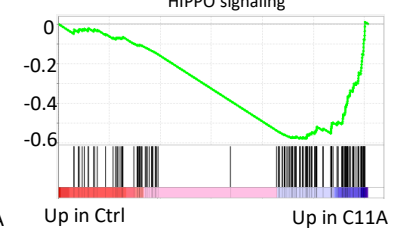

**L**

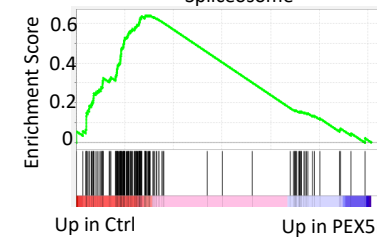

**M**

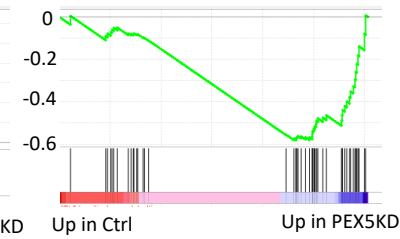

| <b>NAME</b>                       | <b>NES</b> | <b>FDR</b> |
|-----------------------------------|------------|------------|
| Ribosome                          | 2.35       | <0.0001    |
| Oxidative phosphorylation         | 1.97       | 0.024      |
| Parkinson disease                 | 1.72       | 0.013      |
| Valine and isoleucine degradation | 1.67       | 0.024      |

**PEX5 C11A – UP (Top 20 pathways)**

| <b>NAME</b>                                              | <b>NES</b> | <b>FDR</b> |
|----------------------------------------------------------|------------|------------|
| Signaling pathways regulating pluripotency of stem cells | -2.06      | <0.0001    |
| Spinocerebellar ataxia                                   | -2.00      | <0.0001    |
| MAPK signaling pathway                                   | -1.94      | 0.001      |
| MicroRNAs in cancer                                      | -1.89      | 0.004      |
| Osteoclast differentiation                               | -1.88      | 0.003      |
| Neuroactive ligand-receptor interaction                  | -1.87      | 0.004      |
| Regulation of lipolysis in adipocytes                    | -1.85      | 0.004      |
| HIPPO signaling pathway                                  | -1.84      | 0.004      |
| Type II diabetes mellitus                                | -1.83      | 0.004      |
| WNT signaling pathway                                    | -1.83      | 0.004      |
| Acute myeloid leukemia                                   | -1.82      | 0.003      |
| Breast cancer                                            | -1.80      | 0.004      |
| Cushing syndrome                                         | -1.80      | 0.004      |
| B cell receptor signaling pathway                        | -1.78      | 0.005      |
| CAMP signaling pathway                                   | -1.78      | 0.004      |
| Aldosterone-regulated sodium reabsorption                | -1.78      | 0.004      |
| CGMP-PKG signaling pathway                               | -1.77      | 0.004      |
| Proteoglycans in cancer                                  | -1.76      | 0.005      |
| Olfactory transduction                                   | -1.76      | 0.004      |
| TH1 and TH2 cell differentiation                         | -1.75      | 0.005      |

**Table 2**

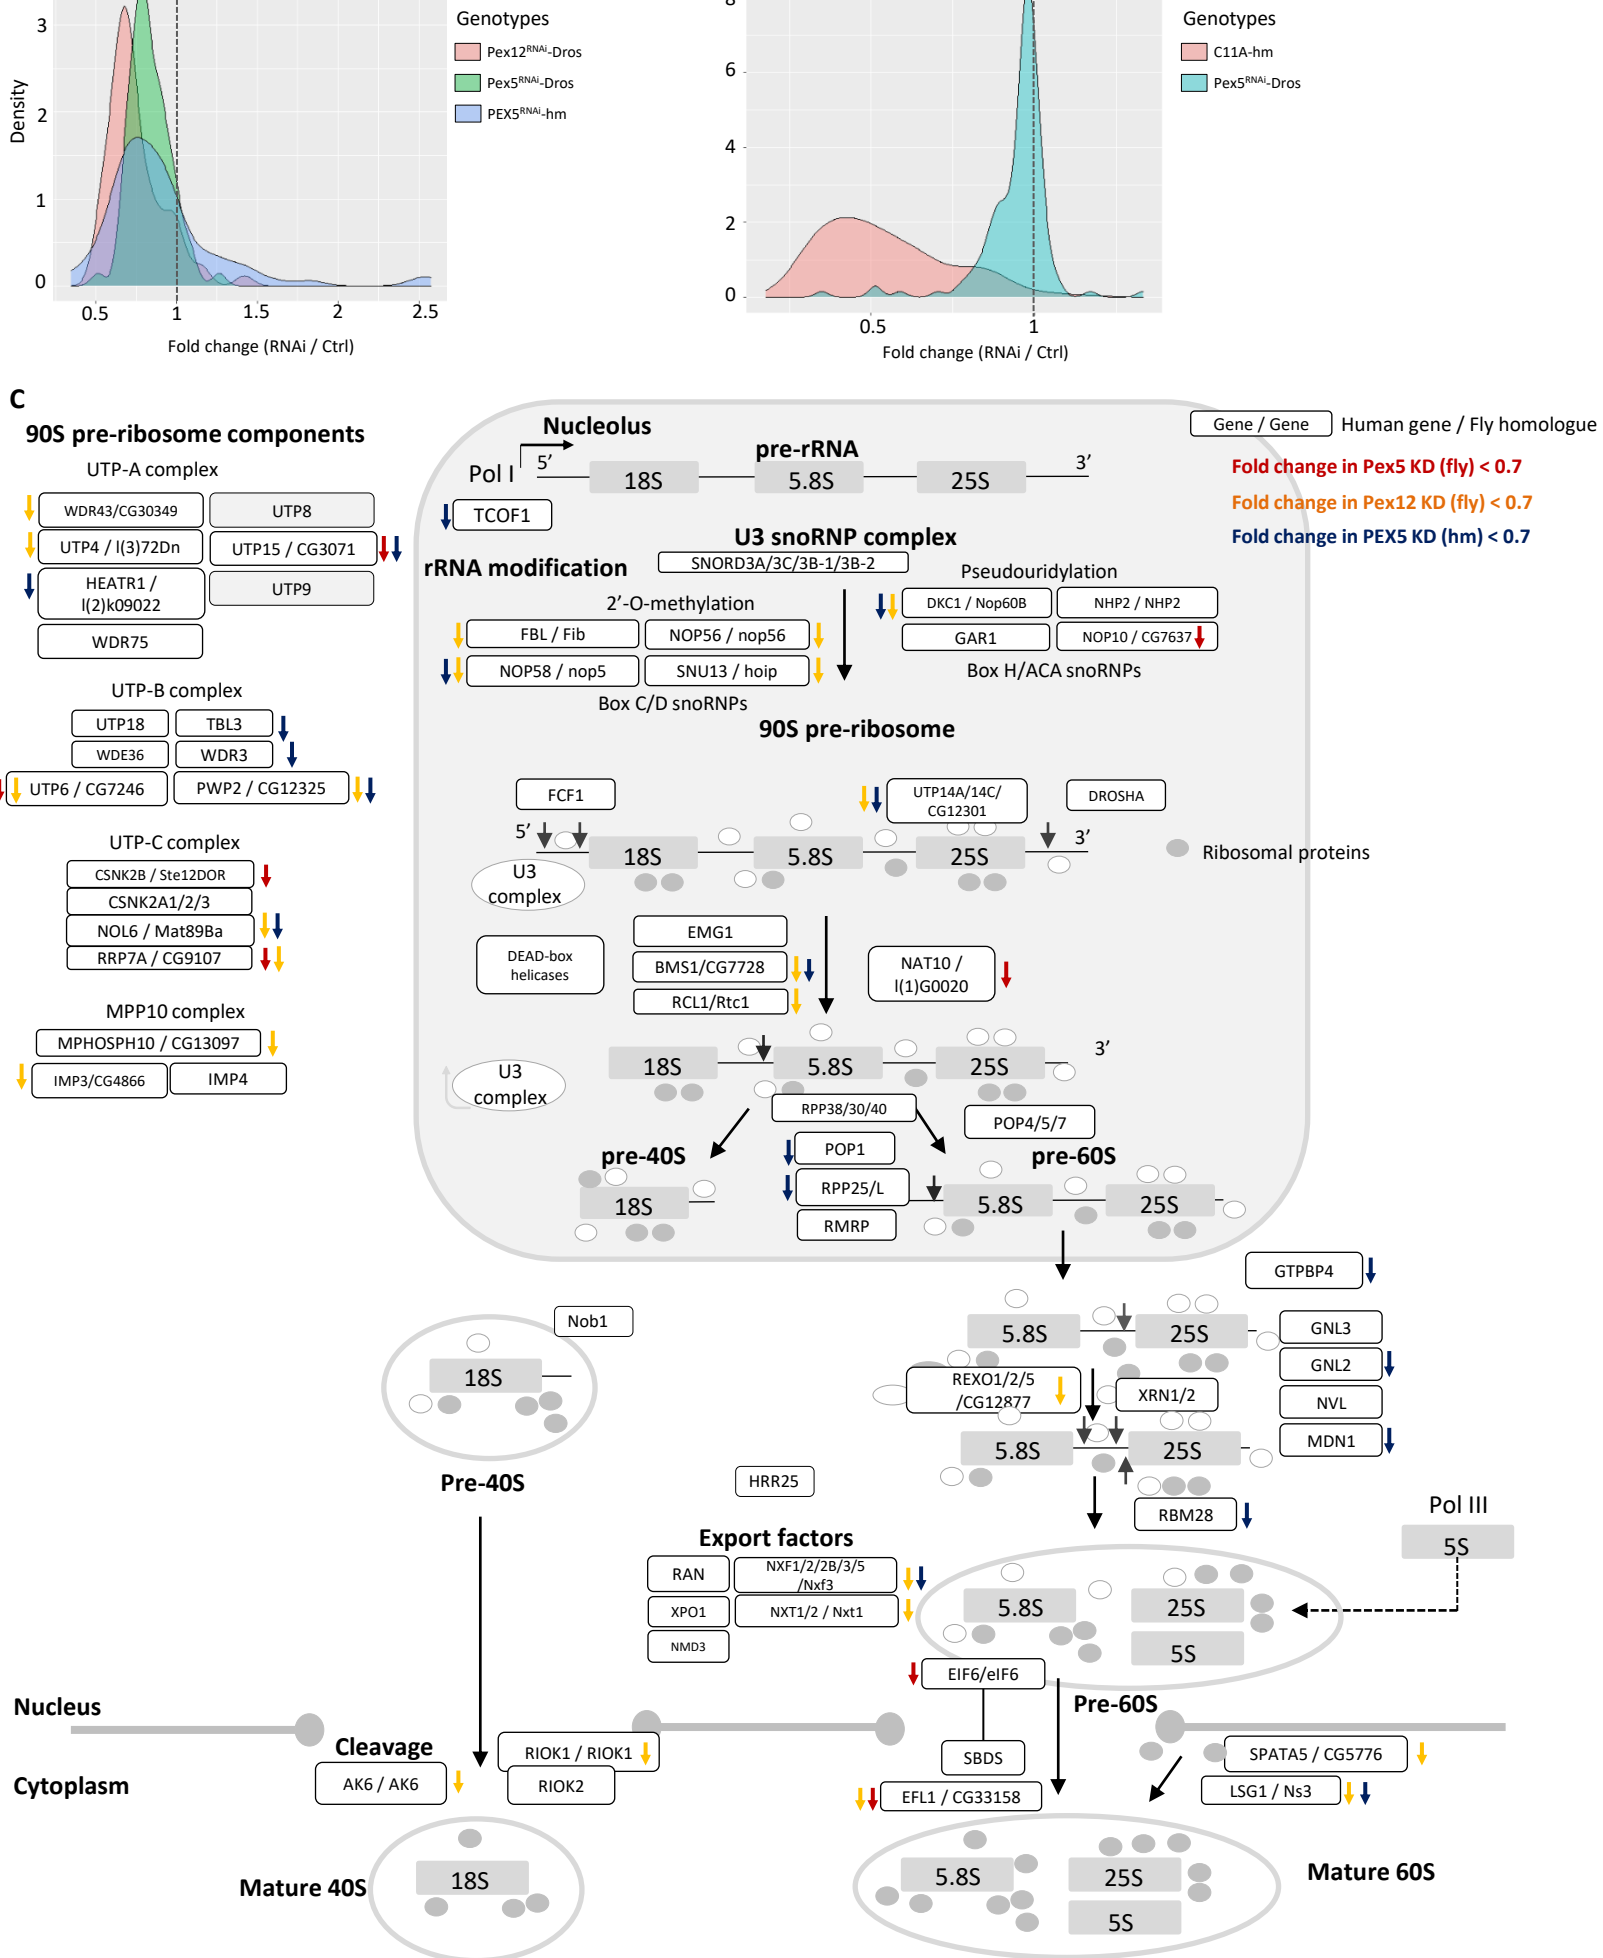

**Figure 5** Peroxisome dysfunction represses ribosomal genes in both flies and humans

**Figure 6**

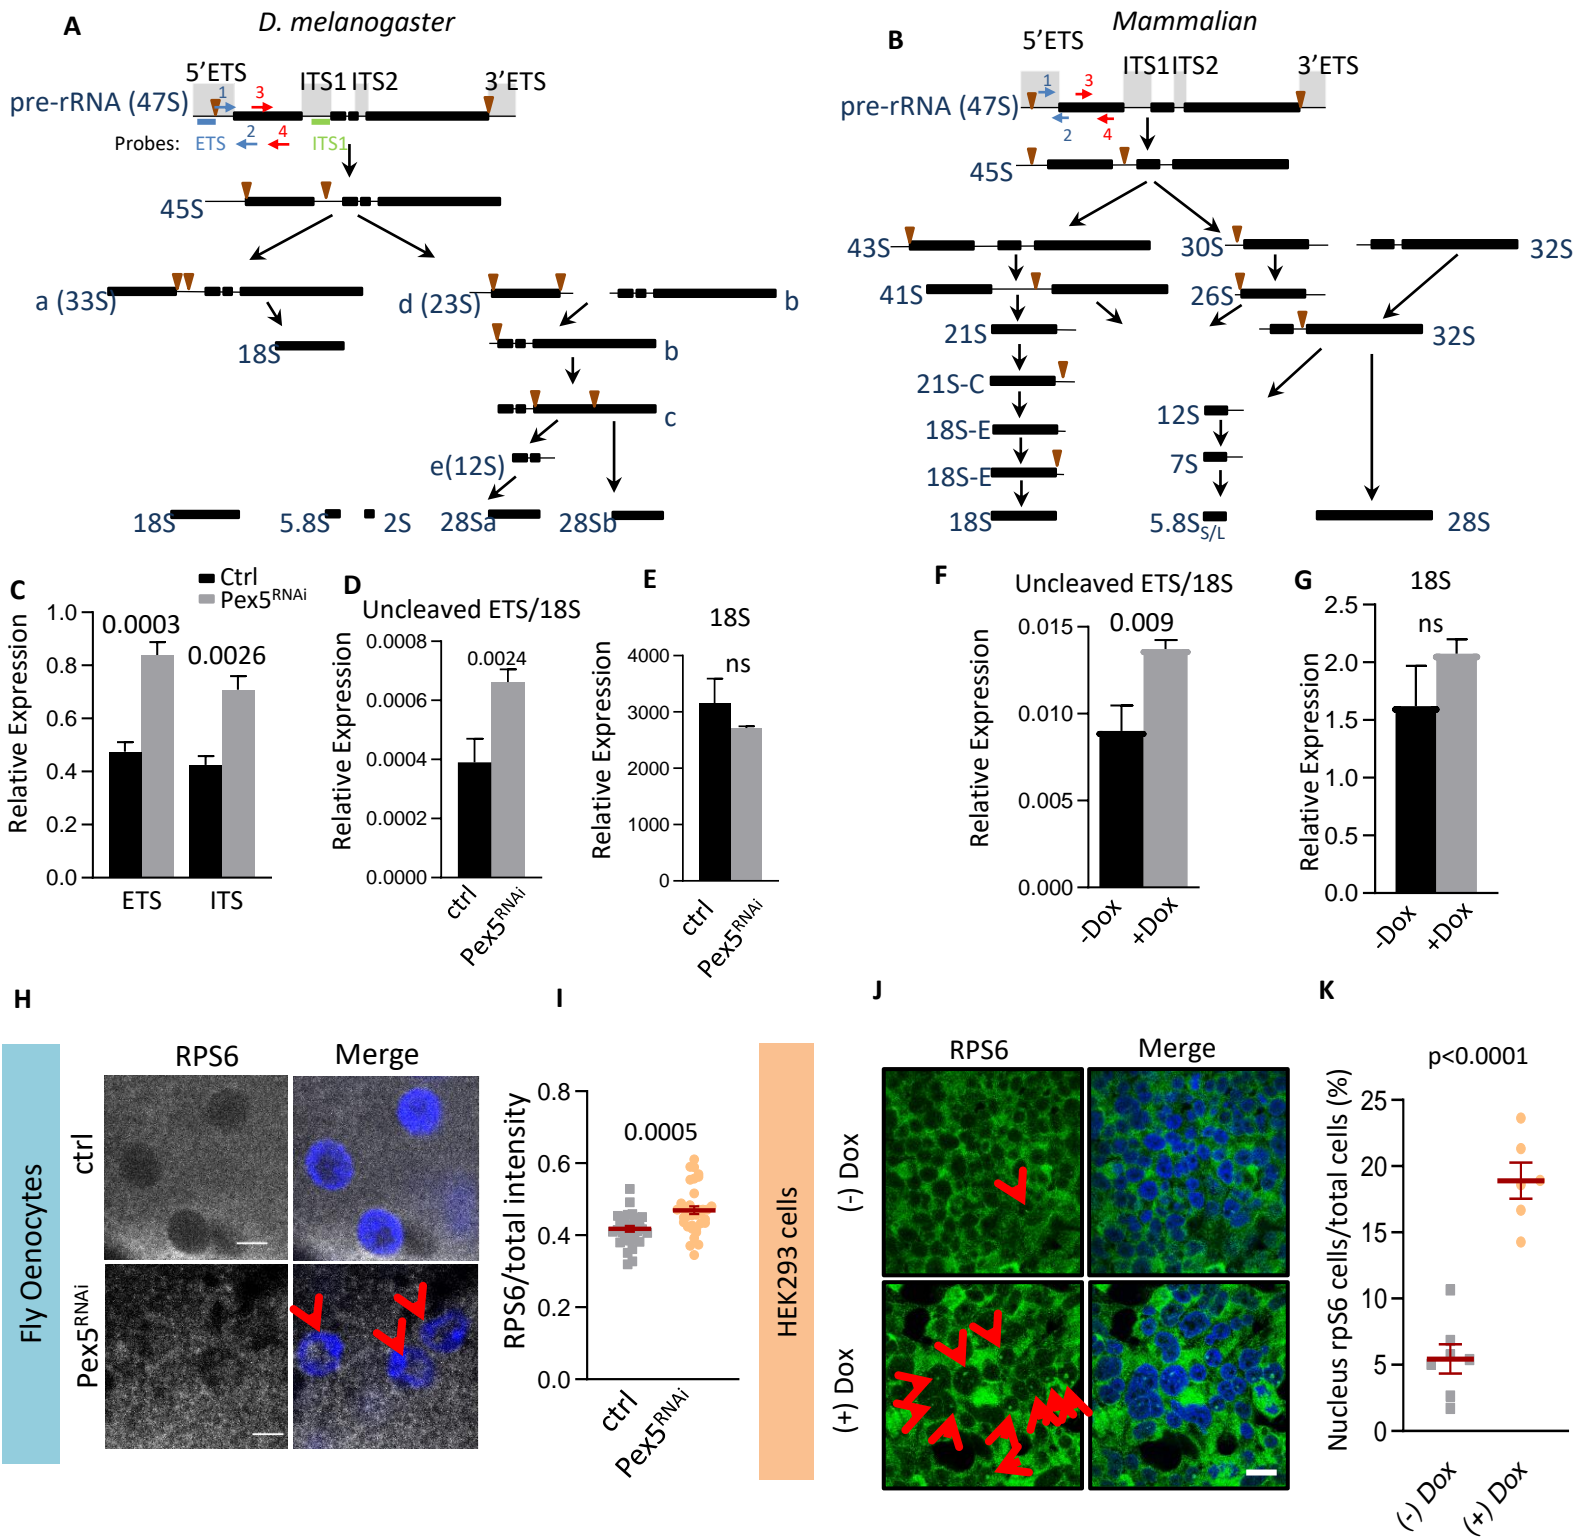

**Supplementary Figure 1**

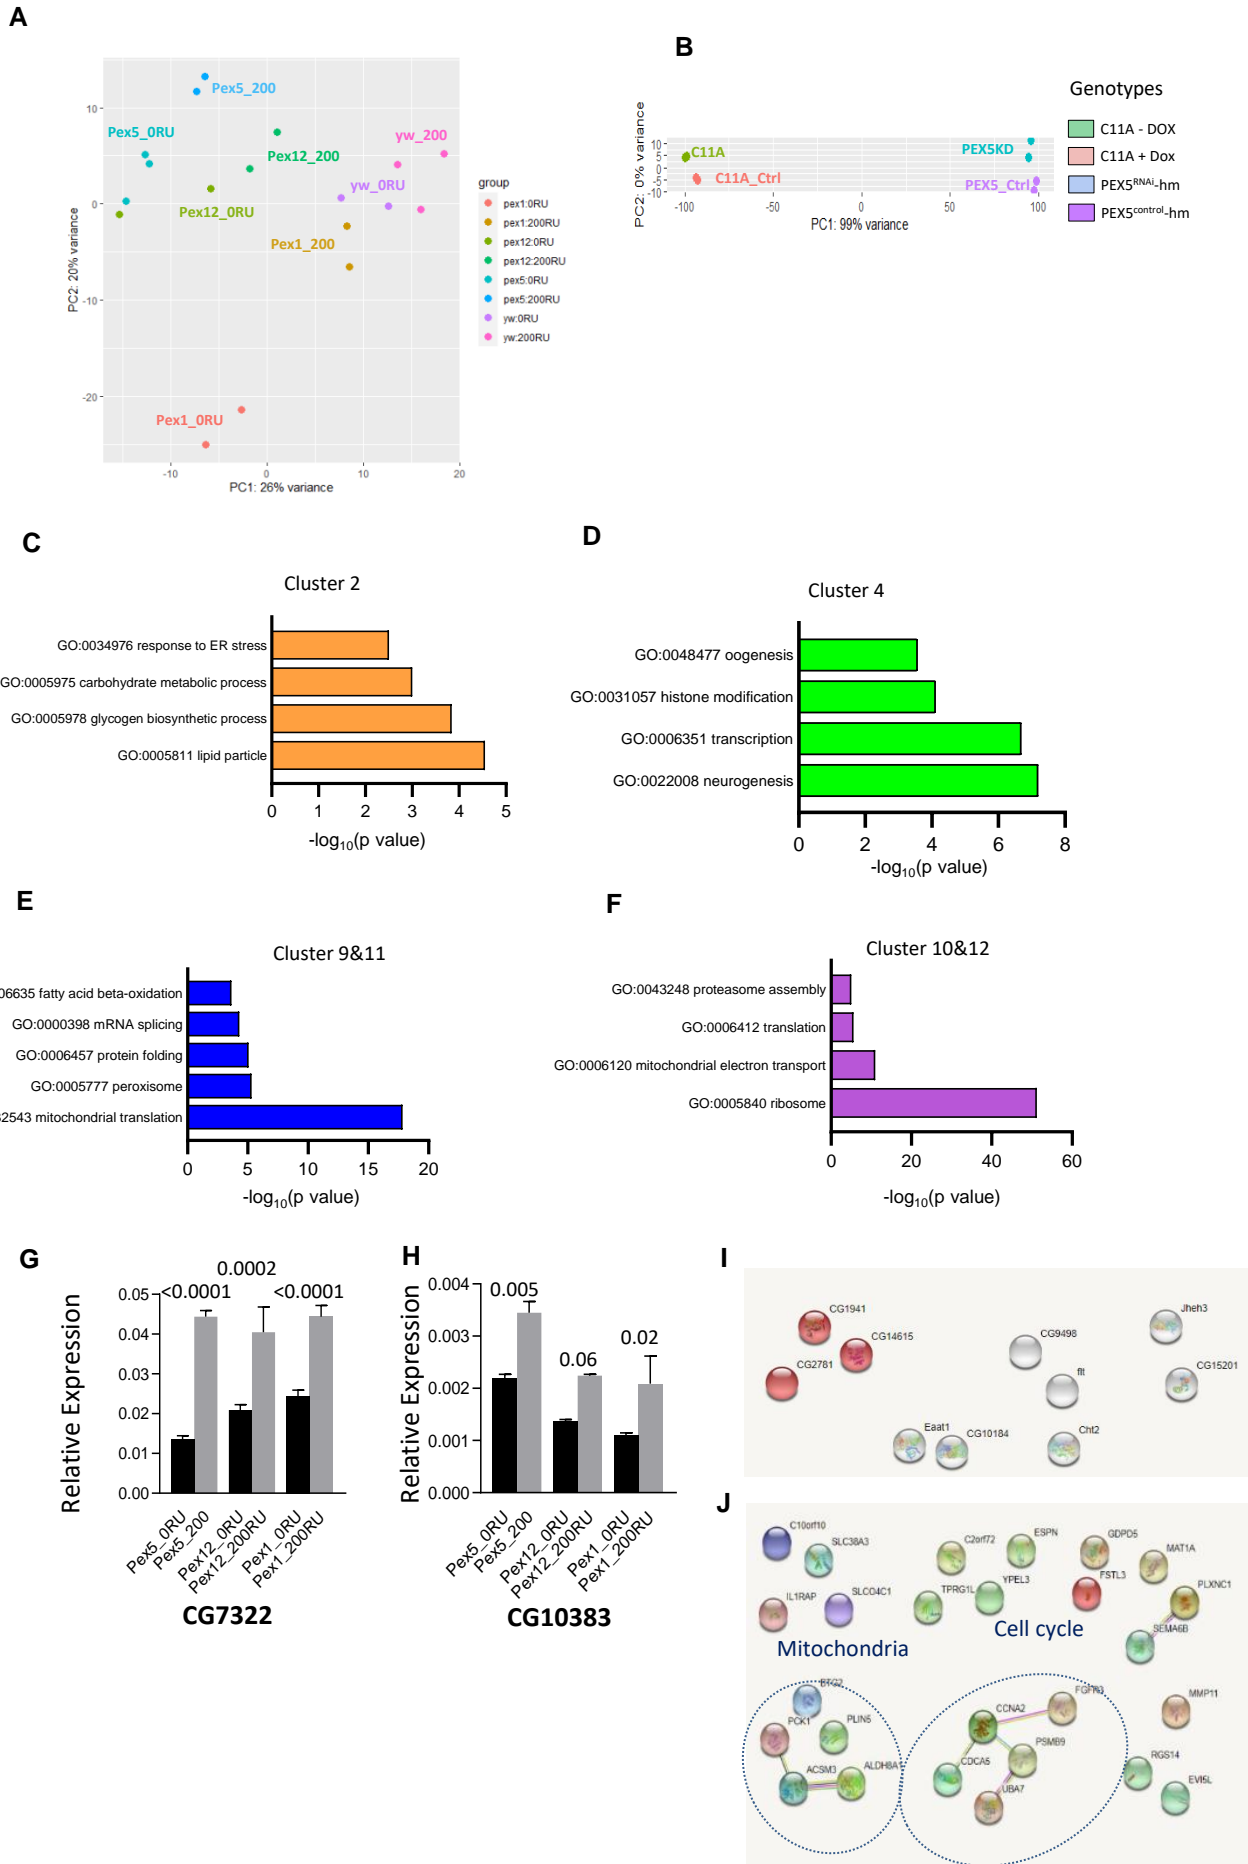

**Supplementary Figure 2**

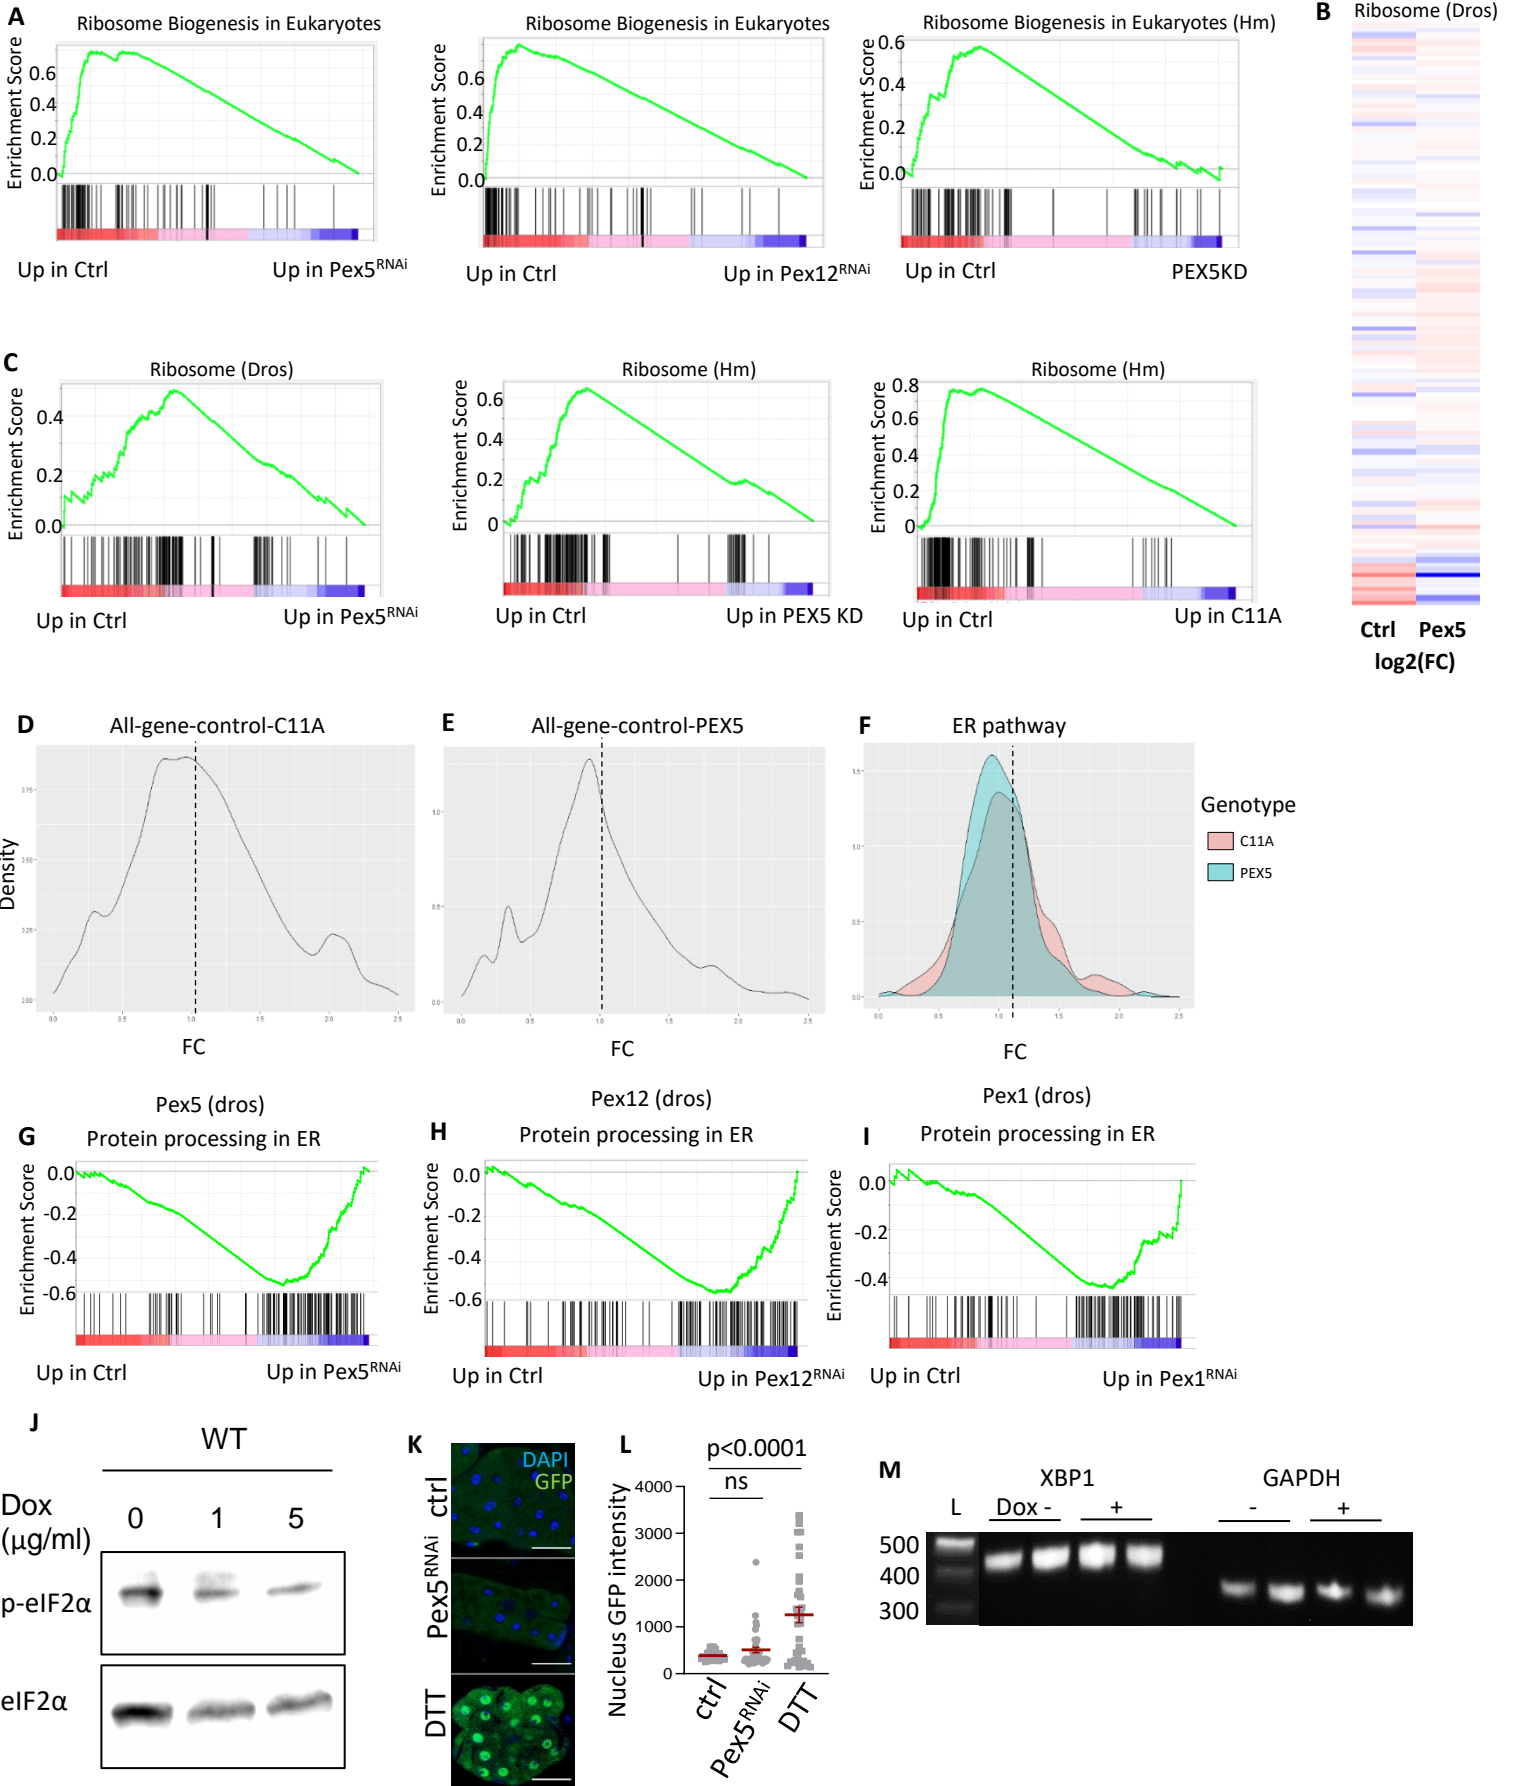

Source: https://www.biorxiv.org/content/biorxiv/early/2021/01/13/2020.11.19.390609.full.pdf
